# Supplementary material for: Control of the electronic and optical properties of aminoxyl radicals via boron complexation
Source: Royal Society of Chemistry journal article supplement (doi:10.1039/d4dt02973a), 2024-11-20
Supplement: d4dt02973a1.pdf [file d4dt02973a1.pdf]

### Table of Contents

|                                                                     |     |
|---------------------------------------------------------------------|-----|
| General remarks                                                     | S2  |
| Synthesis of the new compounds                                      | S3  |
| UV-vis spectrum of aminoxide complex <b>2</b>                       | S7  |
| Single crystal X-ray diffraction analysis                           | S8  |
| Complete citation for the reference 15                              | S9  |
| DFT-optimized coordinates                                           | S10 |
| Copies of the $^1\text{H}$ and $^{13}\text{C}$ NMR and HRMS spectra | S27 |
| References                                                          | S43 |

## General remarks

All the manipulations were carried out under dry argon atmosphere using the standard Schlenk technique. Flash column chromatography ( $\text{SiO}_2$ ) was carried out using a Biotage Isolera One system. Preparative gel-permeation chromatography (GPC) was carried out by a JAI LC-9204 recycling preparative HPLC equipped with a JAI JAIGEL-2HR Plus GPC column (solvent:  $\text{CHCl}_3$ ).  $^1\text{H}$ ,  $^{19}\text{F}$ ,  $^{13}\text{C}$  NMR spectra were recorded on a JEOL JNM-ECZ600R ( $^1\text{H}$ : 600 MHz,  $^{19}\text{F}$ : 564 MHz,  $^{13}\text{C}$ : 150 MHz) spectrometer equipped with a JEOL ROYAL probe and referenced to appropriate internal or external standards ( $^1\text{H}$  and  $^{13}\text{C}$ :  $\text{SiMe}_4$  (0 ppm),  $^{19}\text{F}$ :  $\text{C}_6\text{F}_6$  in  $\text{CDCl}_3$  (-161.64 ppm)<sup>1</sup>).  $^{13}\text{C}\{^1\text{H},^{19}\text{F}\}$  NMR spectra were recorded using the  $^1\text{H}$  and  $^{19}\text{F}$  simultaneous decoupling method. Chemical shifts were reported as the delta scale in ppm. High-resolution mass spectra (HRMS) were recorded on a Bruker micrOTOF mass spectrometer (APCI or ESI). Electrochemical measurements were performed under dry argon atmosphere using a BAS Electrochemical Analyzer Model 1210C, a glassy carbon working electrode (diameter: 3 mm), a Pt wire counter electrode, and a Ag wire/ $\text{AgNO}_3$  in MeCN reference electrode. UV-vis-NIR spectra were recorded on a JASCO V-670 spectrometer. ESR spectra were recorded at the X-band frequency using a JEOL JES-X320 spectrometer equipped with a 100 kHz magnetic-field modulation. ESR microwave power low enough to prevent the saturation and distortion of the spectrum. ESR spectra were recorded at 25 °C. Elemental analysis was carried out using a YANACO MT-6 microanalyzer. Tris(4-bromophenyl)aminium hexachloroantimonate ( $[(p\text{-BrC}_6\text{H}_4)_3\text{N}]\text{SbCl}_6$ , Magic Blue) was purchased from Merck and purified by re-precipitation from  $\text{CH}_2\text{Cl}_2$  and  $\text{Et}_2\text{O}$  before use.  $(\text{C}_6\text{F}_5)_2\text{BOEt}$  and  $p\text{-(Ar}_2\text{N)C}_6\text{H}_4\text{B(OH)}_2$  (Ar = 4-*tert*-butylphenyl) were prepared according to literatures.<sup>2,3</sup>

## Synthesis of the new compounds

### 4-(6-Bromopyridin-3-yl)-*N,N*-bis(4-(*tert*-butyl)phenyl)aniline (5).

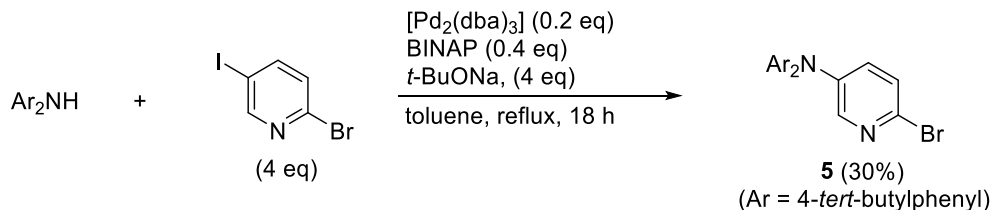

A mixture of 2-bromo-5-iodopyridine (8.51 g, 30.0 mmol),  $\text{Ar}_2\text{NH}$  (2.19 g, 7.77 mmol),  $[\text{Pd}_2(\text{dba})_3]$  (0.19 g, 0.21 mmol), BINAP (0.26 g, 0.41 mmol) and *t*-BuONa (2.91 g, 30.00 mmol) and toluene (40 mL) was refluxed for 18 h. The reaction was quenched with aq.  $\text{NH}_4\text{Cl}$  and extracted with AcOEt three times. The organic layer was dried over  $\text{MgSO}_4$  and concentrated under reduced pressure. The residue was subjected to GPC to give **5** as an orange solid (1.00 g, 2.30 mmol, 30%).

$^1\text{H}$  NMR (600 MHz,  $\text{CDCl}_3$ )  $\delta$  8.08 (d,  $J = 2.8$  Hz, 1H), 7.32 (d,  $J = 8.3$  Hz, 4H), 7.28 (d,  $J = 9.6$  Hz, 1H), 7.23 (dd,  $J = 8.3, 2.8$  Hz, 1H), 7.04 (d,  $J = 9.0$  Hz, 4H), 1.34 (s, 18H);  $^{13}\text{C}$  NMR (151 MHz,  $\text{CDCl}_3$ )  $\delta$  147.1, 144.3, 143.6, 143.6, 131.9, 130.9, 127.6, 126.5, 124.2, 34.4, 31.3; HRMS (APCI $^+$ )  $m/z$  437.1584 ( $[\text{M}+\text{H}]^+$ , calcd 437.1587).

### 4-(6-Bromopyridin-3-yl)-*N,N*-bis(4-(*tert*-butyl)phenyl)aniline 6.

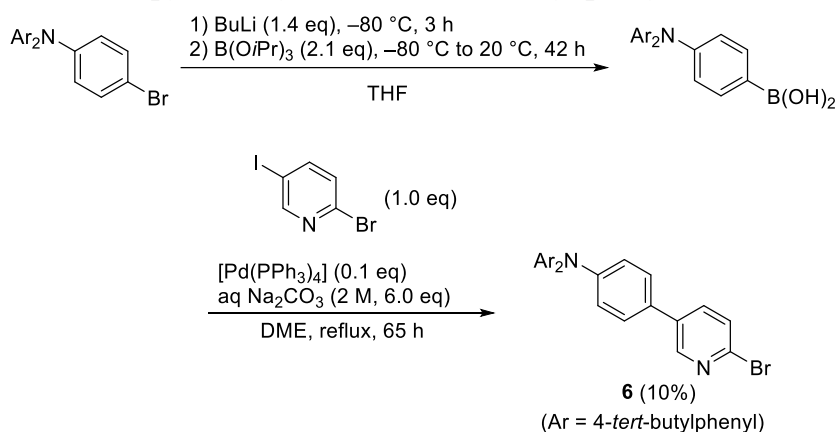

To a THF (50 mL) solution of 4-bromo-*N,N*-bis(4-*tert*-butylphenyl)aniline (3.76 g, 8.60 mmol) was added BuLi (1.58 M in hexane, 8.0 mL, 13 mmol) at  $-80$  °C, and the mixture was stirred for 3 h.  $\text{B}(\text{O}i\text{Pr})_3$  (4.1 mL, 18 mmol) was added, and the mixture was gradually warmed to  $20$  °C for 42 h and then quenched with  $\text{H}_2\text{O}$  (50 mL). The mixture was extracted with AcOEt and the organic layer was dried over  $\text{MgSO}_4$  and concentrated in vacuo to afford the boronic acid as a colorless solid. The crude boronic acid was mixed with 2-bromo-5-iodopyridine (2.48

g, 8.73 mmol), [Pd(PPh<sub>3</sub>)<sub>4</sub>] (0.98 g, 0.85 mmol), aq. Na<sub>2</sub>CO<sub>3</sub> (2 M, 26 mL, 52 mmol), and DME (80 mL). The mixture was refluxed for 65 h and then quenched with aq. NH<sub>4</sub>Cl and extracted with AcOEt three times. The organic layer was dried over MgSO<sub>4</sub> and concentrated under reduced pressure. The residue was subjected to GPC to give **6** as an orange solid (0.44 g, 0.85 mmol, 10% from 4-bromo-*N,N*-bis(4-*tert*-butylphenyl)aniline).

<sup>1</sup>H NMR (600 MHz, CDCl<sub>3</sub>) δ 8.55 (d, *J* = 2.8 Hz, 1H), 7.69 (dd, *J* = 8.3, 2.8 Hz, 1H), 7.50 (d, *J* = 8.3 Hz, 1H), 7.38 (d, *J* = 8.3 Hz, 2H), 7.29 (d, *J* = 8.3 Hz, 4H), 7.11 (d, *J* = 8.3 Hz, 2H), 7.05 (d, *J* = 2.8 Hz, 4H), 1.32 (s, 18H); <sup>13</sup>C NMR (151 MHz, CDCl<sub>3</sub>) δ 148.7, 147.9, 146.4, 144.5, 139.9, 136.2, 135.7, 128.6, 127.9, 127.4, 126.2, 124.5, 122.3, 34.3, 31.4; HRMS (APCI<sup>+</sup>) *m/z* 513.1899 ([*M*+*H*]<sup>+</sup>, calcd 513.1900).

### Aminoxide-boron complex **2**.

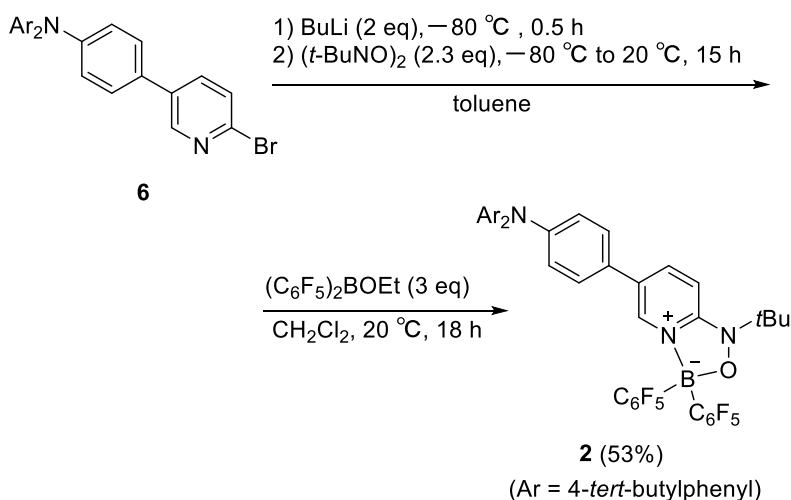

To a toluene (10 mL) solution of **6** (0.40 g, 0.78 mmol) was added BuLi (1.58 M in hexane, 1.0 mL, 1.6 mmol) at -80 °C, and the mixture was stirred for 0.5 h before the addition of (*t*-BuNO)<sub>2</sub> (0.16 g, 1.8 mmol as the monomer). The mixture was gradually warmed to 20 °C for 15 h. The reaction was quenched with aq. NH<sub>4</sub>Cl and extracted with EtOAc three times. The organic layer was dried over MgSO<sub>4</sub> and concentrated under reduced pressure. The residue was dissolved in CH<sub>2</sub>Cl<sub>2</sub> (10 mL), and (C<sub>6</sub>F<sub>5</sub>)<sub>2</sub>BOEt (830 mg, 2.13 mmol) was added. The mixture was stirred at 20 °C for 18 h and concentrated under reduced pressure. The residue was subjected to a flash chromatography (SiO<sub>2</sub>, DCM/hexane = 1:20 to 2:3) to give **2** as a yellow solid (360 mg, 0.42 mmol, 53%).

<sup>1</sup>H NMR (600 MHz, CDCl<sub>3</sub>) δ 7.98 (s, 1H), 7.82 (dd, *J* = 9.6, 2.1 Hz, 1H), 7.28 (d, *J* = 9.0 Hz, 4H), 7.25 (d, *J* = 7.6 Hz, 2H), 7.12 (d, *J* = 9.0 Hz, 1H), 7.09 (d, *J* = 9.0 Hz, 2H), 7.05 (d, *J* = 8.3

Hz, 4H), 1.54 (s, 9H), 1.32 (s, 18H);  $^{13}\text{C}$  NMR (151 MHz,  $\text{CDCl}_3$ )  $\delta$  152.4, 148.6, 148.2, 146.5, 144.4, 139.5, 137.9, 137.0, 136.3, 135.8, 128.0, 127.4, 126.7, 126.2, 124.5, 122.3, 108.2, 61.6, 34.3, 31.4, 27.9;  $^{19}\text{F}$  NMR (565 MHz,  $\text{CDCl}_3$ )  $\delta$  -134.6 (d,  $J = 25.4$  Hz, 4F), -156.6 (t,  $J = 19.1$  Hz, 2F), -163.4 (t,  $J = 22.3$  Hz, 4F); HRMS (APCI $^+$ )  $m/z$  866.3340 ( $[\text{M}+\text{H}]^+$ , calcd 866.3342).

### Aminoxyl-boron complex $[\mathbf{2}]\text{SbCl}_6$ .

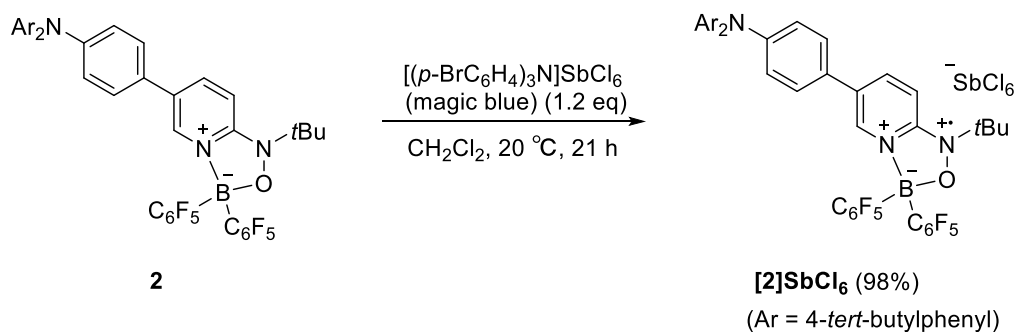

To a  $\text{CH}_2\text{Cl}_2$  (3 mL) solution of **2** (129 mg, 0.15 mmol) was added Magic Blue (150 mg, 0.18 mmol), and the solution was stirred at 20 °C for 21 h. The reaction mixture was concentrated under reduced pressure. The residue was washed with anhydrous  $\text{Et}_2\text{O}$  and dried to afford  $[\mathbf{2}]\text{SbCl}_6$  as green crystals (176 mg, 0.15 mmol, 98%).

HRMS (APCI $^+$ )  $m/z$  866.3550 ( $[\text{M}+\text{H}]^+$ , calcd 866.3342).

Anal. calcd for  $\text{C}_{47}\text{H}_{42}\text{BCl}_6\text{F}_{10}\text{N}_3\text{OSb} + 2\text{CH}_2\text{Cl}_2$ : C, 42.96; H, 3.38; N, 3.07. Found: C, 42.78; H, 3.14; N, 3.00.

### Aminoxyl radical **3**.

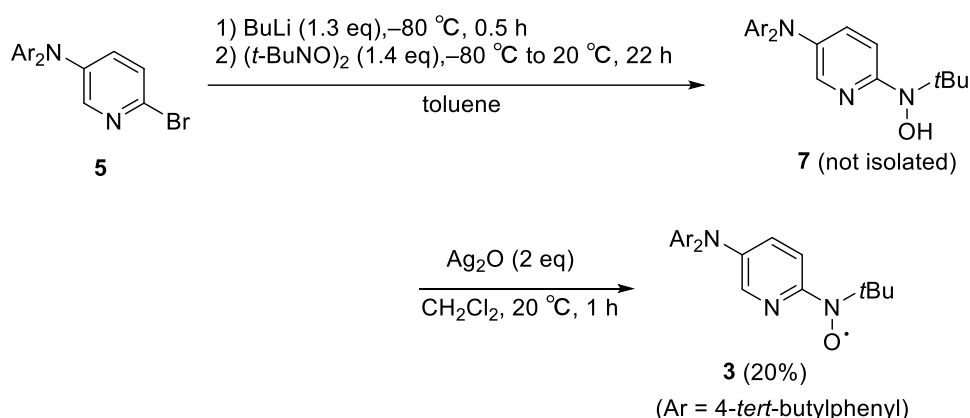

To a toluene (10 mL) solution of **5** (546 mg, 1.25 mmol) was added BuLi (1.58 M in hexane, 1.0 mL, 1.8 mmol as the monomer) at  $-80$  °C, and the mixture was stirred for 0.5 h before the addition of  $(t\text{-BuNO})_2$  (155 mg, 1.78 mmol as the monomer). The mixture was gradually warmed to 20 °C for 22 h. The reaction was quenched with aq.  $\text{NH}_4\text{Cl}$  and extracted with

EtOAc three times. The organic layer was dried over MgSO<sub>4</sub> and concentrated under reduced pressure to give hydroxylamine **7**. Crude **7** was dissolved in DCM (60 mL), and Ag<sub>2</sub>O (1.08 g, 2.50 mmol) was added. The mixture was stirred at rt in the dark for 1 h and then was filtered over a Celite pad. The filtrate was concentrated under reduced pressure. The residue was subjected to a flash chromatography (SiO<sub>2</sub>, DCM) to give **3** as a dark blue solid (108 mg, 0.24 mmol, 20% from **5**).

HRMS (APCI<sup>+</sup>) *m/z* 445.3107 ([M+H]<sup>+</sup>, calcd 445.3213). Anal. calcd for C<sub>29</sub>H<sub>38</sub>N<sub>3</sub>O<sub>1</sub>: C, 78.34; H, 8.61; N, 9.45; found: C, 72.61; H, 8.05; N, 7.80.

#### Aminoxyl radical **4**.

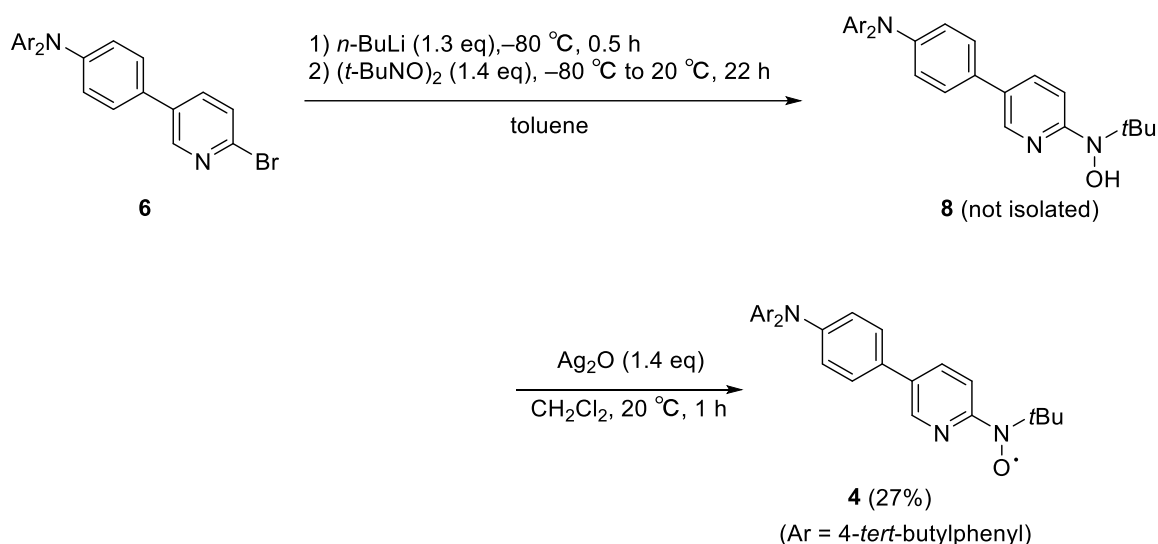

To a toluene (10 mL) solution of **6** (546 mg, 1.25 mmol) was added BuLi (1.58 M in hexane, 1.0 mL, 1.6 mmol) at -80 °C, and the mixture was stirred for 0.5 h before the addition of (*t*-BuNO)<sub>2</sub> (152 mg, 1.74 mmol as the monomer). The mixture was gradually warmed to 20 °C for 22 h. The reaction was quenched with aq. NH<sub>4</sub>Cl and extracted with EtOAc three times. The organic layer was dried over MgSO<sub>4</sub> and concentrated under reduced pressure to give hydroxylamine **8**. Crude **8** was dissolved in DCM (50 mL), and Ag<sub>2</sub>O (745 mg, 1.82 mmol) was added. The mixture was stirred for 1 h and then was filtered over a Celite pad. The filtrate was concentrated under reduced pressure. The residue was subjected to a flash chromatography (SiO<sub>2</sub>, DCM/hexane = 1:10 to 2:1) to give **4** as a dark purple solid (171 mg, 0.33 mmol, 27% from **6**). HRMS (APCI<sup>+</sup>) *m/z* 521.3247 ([M+H]<sup>+</sup>, calcd 521.3401).

### UV-vis spectrum of aminoxide complex 2

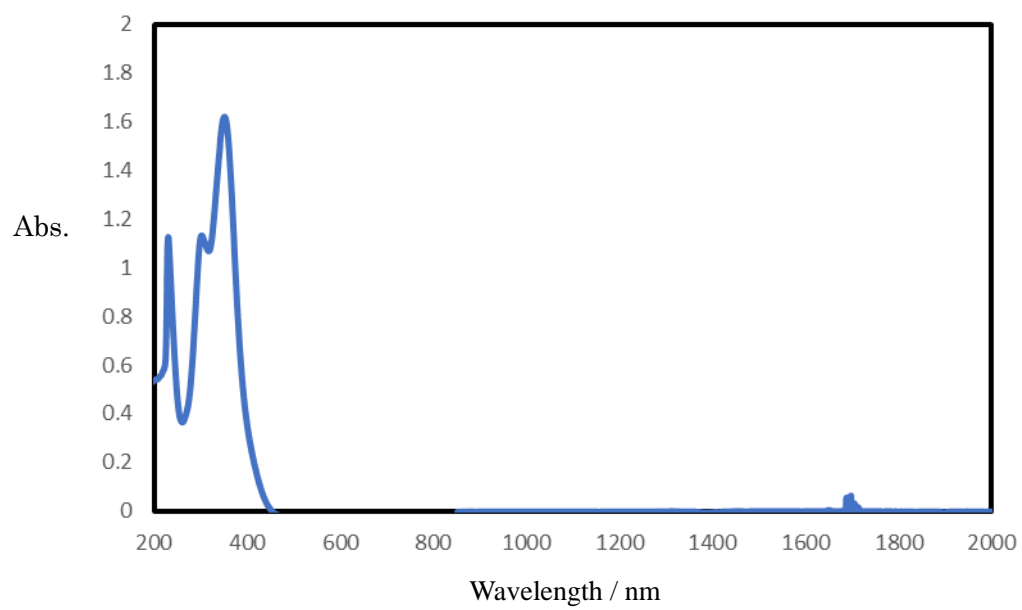

In DCM at 20 °C ( $5.0 \times 10^{-5}$  M).

### **Single crystal X-ray diffraction analysis**

X-Ray diffraction measurements were carried out on a Rigaku MicroMax-007HF diffractometer equipped with a VariMax light source or on a Bruker D8 VENTURE diffractometer (Mo  $K\alpha$ ,  $\lambda = 0.71073 \text{ \AA}$ ). The crystals were kept at 90 or 213 K while the data collection. The collected data were processed using the CrysAlisPro (ver. 1.171.41.117a) (Rigaku Oxford Diffraction, 2021) or the SAINT (V8.40A) (Bruker Nano, Inc., 2019) program packages. Using the Olex2 program,<sup>4</sup> the structures were solved with the SHELXT and refined with the SHELXL program packages.<sup>5</sup> The full-matrix least-squares refinements were performed on  $F^2$ . All non-hydrogen atoms were refined anisotropically. Hydrogen atoms were refined using the riding model.



### **Complete citation for the reference 15**

M. J. Frisch, G. W. Trucks, H. B. Schlegel, G. E. Scuseria, M. A. Robb, J. R. Cheeseman, G. Scalmani, V. Barone, G. A. Petersson, H. Nakatsuji, X. Li, M. Caricato, A. V. Marenich, J. Bloino, B. G. Janesko, R. Gomperts, B. Mennucci, H. P. Hratchian, J. V. Ortiz, A. F. Izmaylov, J. L. Sonnenberg, D. Williams-Young, F. Ding, F. Lipparini, F. Egidi, J. Goings, B. Peng, A. Petrone, T. Henderson, D. Ranasinghe, V. G. Zakrzewski, J. Gao, N. Rega, G. Zheng, W. Liang, M. Hada, M. Ehara, K. Toyota, R. Fukuda, J. Hasegawa, M. Ishida, T. Nakajima, Y. Honda, O. Kitao, H. Nakai, T. Vreven, K. Throssell, J. A. Montgomery, Jr., J. E. Peralta, F. Ogliaro, M. J. Bearpark, J. J. Heyd, E. N. Brothers, K. N. Kudin, V. N. Staroverov, T. A. Keith, R. Kobayashi, J. Normand, K. Raghavachari, A. P. Rendell, J. C. Burant, S. S. Iyengar, J. Tomasi, M. Cossi, J. M. Millam, M. Klene, C. Adamo, R. Cammi, J. W. Ochterski, R. L. Martin, K. Morokuma, O. Farkas, J. B. Foresman and D. J. Fox, Gaussian 16, Revision C.02, Gaussian, Inc., Wallingford CT, 2019.

**DFT-optimized coordinates**

## Aminoxide complex 1

|   |          |          |          |
|---|----------|----------|----------|
| F | -5.09942 | -1.12678 | -0.32373 |
| F | -0.67467 | -2.11641 | -1.65635 |
| F | -3.42459 | 0.896237 | -2.04822 |
| F | -6.02454 | -2.76792 | -2.22347 |
| F | -4.29563 | -4.0839  | -3.85203 |
| F | -1.61699 | -3.73267 | -3.54141 |
| O | -3.08265 | -1.07338 | 1.612046 |
| F | -2.47264 | 5.110435 | -0.30464 |
| F | -1.65859 | 1.348533 | 2.326276 |
| F | -3.38621 | 3.530337 | -2.31267 |
| N | -0.92363 | -0.92362 | 0.851043 |
| F | -1.63135 | 3.988506 | 2.018695 |
| N | 2.58748  | 0.000452 | 0.560412 |
| N | -2.25366 | -2.02352 | 2.24372  |
| C | -0.96465 | -1.73799 | 1.92115  |
| C | 1.42625  | -0.68422 | 0.964738 |
| C | 4.897724 | -2.69402 | -0.53219 |
| H | 4.809187 | -3.68749 | -0.95217 |
| C | 0.219482 | -0.41844 | 0.37118  |
| H | 0.130595 | 0.24772  | -0.47502 |
| C | 3.772341 | -0.71301 | 0.265816 |
| C | -2.85052 | -1.57366 | -0.87592 |
| C | 3.725984 | -1.99344 | -0.273   |
| H | 2.768974 | -2.44636 | -0.50582 |
| C | -2.55958 | 0.980659 | 0.16128  |
| C | 6.151547 | -2.14479 | -0.28649 |
| C | 2.967393 | 1.950323 | -0.88648 |
| H | 3.496965 | 1.324603 | -1.59541 |
| C | 0.250638 | -2.15477 | 2.494139 |
| H | 0.269691 | -2.85062 | 3.314967 |
| C | 2.467714 | 1.392818 | 0.287814 |
| C | 1.419379 | -1.60895 | 2.02607  |

|   |          |          |          |
|---|----------|----------|----------|
| H | 2.358659 | -1.87675 | 2.495836 |
| C | 5.021937 | -0.14807 | 0.524807 |
| H | 5.081169 | 0.847643 | 0.948195 |
| C | -2.80669 | -2.38622 | 3.572547 |
| C | 2.774924 | 3.294946 | -1.15634 |
| H | 3.168942 | 3.688915 | -2.0864  |
| C | 2.070715 | 4.134144 | -0.28927 |
| C | 6.177641 | -0.85112 | 0.243898 |
| H | 7.128023 | -0.37538 | 0.458676 |
| C | -2.99289 | 1.606289 | -0.9988  |
| C | -2.47381 | -3.09735 | -2.7395  |
| C | -4.20763 | -1.77779 | -1.08365 |
| C | -2.01497 | -2.25359 | -1.74086 |
| C | 1.791567 | 2.220322 | 1.177898 |
| H | 1.395002 | 1.809667 | 2.099499 |
| C | -4.71038 | -2.60814 | -2.06541 |
| C | -2.13101 | 1.840855 | 1.167021 |
| C | 1.58936  | 3.56128  | 0.885451 |
| H | 1.038473 | 4.157527 | 1.600414 |
| C | 1.84038  | 5.604004 | -0.65255 |
| C | -3.83223 | -3.27757 | -2.89993 |
| C | -2.06327 | -3.59426 | 4.14696  |
| H | -2.67819 | -4.0447  | 4.926767 |
| H | -1.11587 | -3.32972 | 4.614772 |
| H | -1.88806 | -4.3542  | 3.383324 |
| C | -2.10322 | 3.215058 | 1.037038 |
| C | -2.53022 | 3.789855 | -0.14445 |
| C | -2.98376 | 2.982635 | -1.16719 |
| C | 3.191796 | 6.29419  | -0.89655 |
| H | 3.041292 | 7.3474   | -1.14689 |
| H | 3.744249 | 5.838088 | -1.71989 |
| H | 3.823251 | 6.246843 | -0.00643 |
| C | 7.223773 | -4.2821  | -1.14918 |
| H | 8.181574 | -4.77256 | -1.33538 |

|   |          |          |          |
|---|----------|----------|----------|
| H | 6.68665  | -4.24574 | -2.09955 |
| H | 6.660062 | -4.91866 | -0.4634  |
| C | 7.461652 | -2.88455 | -0.57059 |
| C | 1.1079   | 6.365645 | 0.456399 |
| H | 0.974676 | 7.408165 | 0.159831 |
| H | 1.668881 | 6.361623 | 1.393897 |
| H | 0.114712 | 5.956172 | 0.650532 |
| B | -2.40855 | -0.62462 | 0.378474 |
| C | -2.72138 | -1.18444 | 4.514804 |
| H | -3.16646 | -1.42796 | 5.481723 |
| H | -3.25169 | -0.33173 | 4.093375 |
| H | -1.68347 | -0.88937 | 4.686512 |
| C | -4.26483 | -2.78715 | 3.336885 |
| H | -4.72317 | -3.05981 | 4.289055 |
| H | -4.32219 | -3.64727 | 2.667116 |
| H | -4.83302 | -1.97405 | 2.89332  |
| C | 0.988019 | 5.685365 | -1.93007 |
| H | 0.846034 | 6.727656 | -2.22749 |
| H | -0.00083 | 5.249232 | -1.772   |
| H | 1.454865 | 5.163036 | -2.76722 |
| C | 8.294549 | -2.08279 | -1.5839  |
| H | 9.235007 | -2.59714 | -1.7985  |
| H | 8.541824 | -1.0868  | -1.21237 |
| H | 7.754933 | -1.96047 | -2.52563 |
| C | 8.259169 | -3.0364  | 0.734867 |
| H | 9.199794 | -3.56179 | 0.54981  |
| H | 7.694533 | -3.60753 | 1.475306 |
| H | 8.504371 | -2.07    | 1.178871 |

Aminoxyl complex  $1^+$

|   |          |          |          |
|---|----------|----------|----------|
| F | -1.679   | 0.329048 | 2.060904 |
| F | -3.94244 | -3.34213 | 0.115007 |
| F | -1.21499 | 0.998661 | -2.40798 |
| O | -2.95329 | -1.58663 | -1.61631 |

|   |          |          |          |
|---|----------|----------|----------|
| F | -1.61178 | 3.619334 | -2.62112 |
| F | -4.52534 | 0.807731 | 0.968858 |
| F | -4.46963 | -4.27861 | 2.529896 |
| F | -2.21604 | -0.65369 | 4.491013 |
| N | 2.524327 | -0.03388 | -0.20848 |
| N | -0.88992 | -1.04515 | -0.71745 |
| F | -3.62674 | -2.96347 | 4.749072 |
| F | -3.48908 | 4.854633 | -1.1007  |
| F | -4.95772 | 3.408393 | 0.669109 |
| N | -1.98603 | -2.42396 | -2.04652 |
| C | 3.829186 | -0.58383 | -0.0489  |
| C | -2.81505 | -1.43395 | 0.980086 |
| C | -0.78309 | -2.09127 | -1.58741 |
| C | 0.163314 | -0.42032 | -0.23861 |
| H | -0.02711 | 0.400318 | 0.43802  |
| C | 4.932634 | 0.071035 | -0.59192 |
| H | 4.797724 | 0.991333 | -1.1473  |
| C | 2.324792 | 1.369017 | -0.02698 |
| C | 1.464955 | -0.80806 | -0.59022 |
| C | -2.81872 | 0.783134 | -0.66899 |
| C | -2.39015 | -0.81773 | 2.147349 |
| C | 6.19338  | -0.46581 | -0.42531 |
| H | 7.03435  | 0.057776 | -0.86265 |
| C | 6.405863 | -1.65591 | 0.28147  |
| C | 1.846205 | 4.112427 | 0.342896 |
| C | -2.34533 | 2.916206 | -1.75662 |
| C | 1.613894 | 2.093955 | -0.98512 |
| H | 1.249556 | 1.607015 | -1.88176 |
| C | 2.580375 | 3.370471 | 1.2701   |
| H | 2.965356 | 3.845565 | 2.161857 |
| C | 1.378999 | 3.439804 | -0.79196 |
| H | 0.819452 | 3.974459 | -1.54929 |
| C | -2.14605 | 1.559289 | -1.60385 |
| C | 1.596131 | -1.98671 | -1.37954 |

|   |          |          |          |
|---|----------|----------|----------|
| H | 2.583617 | -2.35282 | -1.62691 |
| C | 0.499261 | -2.6191  | -1.8779  |
| H | 0.611681 | -3.48079 | -2.51616 |
| C | -3.5135  | -2.61673 | 1.163018 |
| C | 2.823121 | 2.016379 | 1.095842 |
| H | 3.380809 | 1.461031 | 1.840593 |
| C | -3.368   | -2.47406 | 3.547002 |
| C | -3.79802 | -3.13911 | 2.414933 |
| C | -2.64948 | -1.29755 | 3.413695 |
| C | 7.824215 | -2.20478 | 0.441249 |
| C | 4.010861 | -1.76226 | 0.664662 |
| H | 3.162598 | -2.25679 | 1.124817 |
| C | -3.78545 | 1.456787 | 0.066755 |
| C | -2.3967  | -3.49932 | -3.01431 |
| B | -2.45234 | -0.77145 | -0.45712 |
| C | 5.284976 | -2.28635 | 0.820582 |
| H | 5.395431 | -3.1978  | 1.391747 |
| C | -3.29687 | 3.55031  | -0.97984 |
| C | 1.538672 | 5.599406 | 0.519055 |
| C | -4.03319 | 2.812642 | -0.0713  |
| C | -1.6863  | -3.25502 | -4.3476  |
| H | -1.91412 | -2.25982 | -4.7314  |
| H | -2.042   | -3.9843  | -5.07573 |
| H | -0.60348 | -3.36118 | -4.28747 |
| C | 8.417875 | -2.48291 | -0.95009 |
| H | 9.431804 | -2.87631 | -0.85335 |
| H | 8.475346 | -1.58184 | -1.56303 |
| H | 7.824367 | -3.22089 | -1.49435 |
| C | 7.85527  | -3.50595 | 1.247507 |
| H | 7.476772 | -3.37131 | 2.263271 |
| H | 8.884077 | -3.85868 | 1.332805 |
| H | 7.281297 | -4.3024  | 0.76822  |
| C | -3.90687 | -3.40345 | -3.21248 |
| H | -4.19852 | -2.44859 | -3.64623 |

|   |          |          |          |
|---|----------|----------|----------|
| H | -4.44509 | -3.5355  | -2.27713 |
| H | -4.20363 | -4.1964  | -3.89937 |
| C | -2.04214 | -4.85278 | -2.39521 |
| H | -2.37245 | -5.6475  | -3.06462 |
| H | -2.55193 | -4.9801  | -1.4403  |
| H | -0.97119 | -4.98539 | -2.23834 |
| C | 8.69047  | -1.16324 | 1.169516 |
| H | 8.292486 | -0.94063 | 2.161856 |
| H | 8.75893  | -0.22394 | 0.618236 |
| H | 9.706729 | -1.54236 | 1.294735 |
| C | 0.012542 | 5.797482 | 0.536995 |
| H | -0.46171 | 5.466684 | -0.38908 |
| H | -0.44686 | 5.252328 | 1.364745 |
| H | -0.2264  | 6.855335 | 0.662753 |
| C | 2.143039 | 6.383835 | -0.65784 |
| H | 1.730182 | 6.070697 | -1.61822 |
| H | 1.933341 | 7.449355 | -0.5446  |
| H | 3.227201 | 6.259727 | -0.7021  |
| C | 2.114034 | 6.160739 | 1.821821 |
| H | 3.202936 | 6.082534 | 1.859086 |
| H | 1.865423 | 7.219703 | 1.905235 |
| H | 1.702351 | 5.663305 | 2.70292  |

Aminoxide complex 2

|   |          |          |          |
|---|----------|----------|----------|
| F | 5.186851 | 2.566319 | 0.04278  |
| F | 3.581785 | -0.76673 | -2.91475 |
| O | 5.302822 | -1.39358 | -0.62151 |
| F | 2.647891 | 1.480629 | 1.260214 |
| F | 6.616754 | -1.06278 | 1.701434 |
| F | 3.611887 | 1.006891 | -4.8976  |
| N | 3.045765 | -1.24026 | -0.21339 |
| F | 2.900288 | 2.277906 | 3.794622 |
| N | 4.780314 | -2.63625 | -0.21943 |
| F | 5.196539 | 4.306552 | -1.95316 |

|   |          |          |          |
|---|----------|----------|----------|
| F | 6.840286 | -0.25092 | 4.202803 |
| F | 4.414603 | 3.5619   | -4.44313 |
| N | -4.72217 | -0.13633 | 0.045225 |
| F | 5.004604 | 1.422428 | 5.296121 |
| C | 3.426481 | -2.53428 | -0.18925 |
| C | -0.67842 | -1.36778 | -0.06351 |
| C | 1.755345 | -0.87501 | -0.19438 |
| H | 1.573554 | 0.18721  | -0.25817 |
| C | 0.735166 | -1.7921  | -0.10663 |
| C | -5.05279 | 1.244269 | 0.100584 |
| C | -7.87467 | -2.986   | 0.03372  |
| C | -5.77064 | -1.09393 | 0.039956 |
| C | -1.67365 | -2.09605 | -0.71559 |
| H | -1.40812 | -2.97467 | -1.29425 |
| C | 4.598756 | 0.151632 | 1.357195 |
| C | 5.596118 | -3.74969 | -0.77229 |
| C | 4.3603   | 0.813439 | -1.32774 |
| C | -5.72696 | -2.21169 | 0.864056 |
| H | -4.87878 | -2.35659 | 1.523158 |
| C | -3.37915 | -0.54656 | 0.011293 |
| C | -2.99649 | -1.6958  | -0.68649 |
| H | -3.74359 | -2.26941 | -1.22042 |
| C | -6.75765 | -3.14205 | 0.84977  |
| H | -6.67834 | -3.99667 | 1.509082 |
| C | 1.124035 | -3.14396 | -0.04254 |
| H | 0.36133  | -3.9082  | 0.055794 |
| C | 2.439465 | -3.52857 | -0.08628 |
| H | 2.704214 | -4.56987 | -0.02618 |
| C | -1.06571 | -0.21999 | 0.629586 |
| H | -0.32568 | 0.35413  | 1.177396 |
| C | -6.01643 | 1.70865  | 0.986236 |
| H | -6.51224 | 1.009731 | 1.649789 |
| C | -5.73232 | 3.988706 | 0.197467 |
| C | -6.35203 | 3.055686 | 1.023689 |



|   |          |          |          |
|---|----------|----------|----------|
| H | -7.11002 | 3.369782 | 1.729395 |
| C | -2.38721 | 0.183686 | 0.672095 |
| H | -2.65957 | 1.068031 | 1.234104 |
| C | 3.983327 | 0.482807 | -2.6244  |
| C | -4.43069 | 2.163034 | -0.74345 |
| H | -3.68276 | 1.819808 | -1.44882 |
| C | 3.699761 | 1.010006 | 1.968601 |
| C | -7.90682 | -1.85023 | -0.77978 |
| H | -8.75164 | -1.68127 | -1.43808 |
| C | 4.771045 | 2.126425 | -1.15191 |
| C | -9.03371 | -3.98627 | 0.000775 |
| C | -4.76143 | 3.504151 | -0.68353 |
| H | -4.25367 | 4.186422 | -1.35599 |
| C | 5.657512 | -0.24717 | 2.158506 |
| C | -6.87912 | -0.92515 | -0.7879  |
| H | -6.93238 | -0.05887 | -1.43692 |
| C | 3.990122 | 1.38041  | -3.67489 |
| C | 7.05537  | -3.42872 | -0.44298 |
| H | 7.196121 | -3.33748 | 0.634198 |
| H | 7.369939 | -2.49562 | -0.90193 |
| H | 7.69029  | -4.23526 | -0.81371 |
| C | 5.230349 | -5.06837 | -0.08594 |
| H | 6.03943  | -5.78174 | -0.24575 |
| H | 4.329971 | -5.52762 | -0.4918  |
| H | 5.113229 | -4.9361  | 0.990967 |
| C | 3.805403 | 1.4503   | 3.271268 |
| C | 5.389641 | -3.83468 | -2.28541 |
| H | 5.641078 | -2.8858  | -2.75782 |
| H | 4.352423 | -4.07368 | -2.53234 |
| H | 6.024878 | -4.61344 | -2.71235 |
| C | 4.793043 | 3.056788 | -2.17835 |
| C | 4.874917 | 1.01931  | 4.034905 |
| C | 4.39889  | 2.681438 | -3.44713 |
| C | -6.07079 | 5.481931 | 0.219219 |

|   |          |          |          |
|---|----------|----------|----------|
| C | 5.804794 | 0.167885 | 3.474148 |
| B | 4.376268 | -0.34278 | -0.19211 |
| C | -8.81693 | -5.15692 | 0.963657 |
| H | -7.91884 | -5.72812 | 0.717888 |
| H | -9.66462 | -5.84316 | 0.907404 |
| H | -8.73577 | -4.82404 | 2.00083  |
| C | -10.3372 | -3.27503 | 0.398777 |
| H | -10.2657 | -2.86029 | 1.406729 |
| H | -11.1762 | -3.97566 | 0.38104  |
| H | -10.5787 | -2.45519 | -0.27982 |
| C | -9.17946 | -4.55578 | -1.4197  |
| H | -9.38332 | -3.77459 | -2.15401 |
| H | -10.0046 | -5.27162 | -1.46232 |
| H | -8.26869 | -5.07265 | -1.7304  |
| C | -7.15149 | 5.816313 | 1.251156 |
| H | -8.09054 | 5.298519 | 1.043136 |
| H | -7.3599  | 6.888165 | 1.233075 |
| H | -6.83996 | 5.562285 | 2.266808 |
| C | -6.5819  | 5.91197  | -1.16544 |
| H | -5.8375  | 5.744746 | -1.94581 |
| H | -6.82845 | 6.977006 | -1.16831 |
| H | -7.48144 | 5.357047 | -1.44126 |
| C | -4.80989 | 6.289053 | 0.568399 |
| H | -4.42291 | 6.007333 | 1.550193 |
| H | -5.03395 | 7.358837 | 0.588677 |
| H | -4.01103 | 6.13424  | -0.15882 |

Aminoxy complex 2<sup>+</sup>

|   |          |          |          |
|---|----------|----------|----------|
| B | -4.35412 | -0.33966 | -0.01316 |
| N | -3.05365 | -1.27626 | -0.06811 |
| C | -3.44822 | -2.57803 | -0.20725 |
| C | -2.44344 | -3.57556 | -0.34303 |
| H | -2.70497 | -4.61116 | -0.4653  |
| C | -1.1391  | -3.19903 | -0.30111 |

|   |          |          |          |
|---|----------|----------|----------|
| H | -0.38586 | -3.97345 | -0.3777  |
| C | -0.74255 | -1.84435 | -0.1218  |
| C | -1.77278 | -0.92645 | -0.01558 |
| H | -1.59883 | 0.135819 | 0.076527 |
| N | -4.76713 | -2.65957 | -0.20342 |
| O | -5.35961 | -1.43925 | 0.01372  |
| C | -4.45668 | 0.461687 | 1.394717 |
| C | -4.86674 | 1.77726  | 1.557372 |
| C | -4.99683 | 2.380385 | 2.798239 |
| C | -4.7242  | 1.656032 | 3.942673 |
| C | -4.3295  | 0.334509 | 3.833276 |
| C | -4.21414 | -0.22657 | 2.577215 |
| F | -5.17252 | 2.539218 | 0.501293 |
| F | -5.38677 | 3.647228 | 2.895401 |
| F | -4.84314 | 2.219689 | 5.13684  |
| F | -4.07191 | -0.37873 | 4.927313 |
| F | -3.84844 | -1.52534 | 2.533155 |
| C | -4.39298 | 0.554191 | -1.37625 |
| C | -5.25173 | 0.330108 | -2.44171 |
| C | -5.24044 | 1.101033 | -3.59534 |
| C | -4.33944 | 2.139665 | -3.71829 |
| C | -3.45621 | 2.395944 | -2.68406 |
| C | -3.50746 | 1.605465 | -1.55623 |
| F | -6.14924 | -0.66376 | -2.41816 |
| F | -6.08676 | 0.839204 | -4.58657 |
| F | -4.31216 | 2.879762 | -4.81858 |
| F | -2.57477 | 3.388657 | -2.78658 |
| F | -2.62634 | 1.905533 | -0.57085 |
| C | -5.76183 | -3.76992 | -0.13175 |
| C | -5.12087 | -5.1243  | -0.40783 |
| H | -4.62882 | -5.1617  | -1.38105 |
| H | -5.9178  | -5.86728 | -0.42587 |
| H | -4.42545 | -5.42812 | 0.375072 |
| C | -6.35941 | -3.74826 | 1.277258 |

|   |          |          |          |
|---|----------|----------|----------|
| H | -5.58748 | -3.89843 | 2.034045 |
| H | -7.09454 | -4.54872 | 1.372107 |
| H | -6.85531 | -2.80044 | 1.474958 |
| C | -6.83015 | -3.48421 | -1.18782 |
| H | -7.29534 | -2.5155  | -1.02705 |
| H | -7.60009 | -4.25507 | -1.13472 |
| H | -6.40234 | -3.49292 | -2.19136 |
| C | 0.645955 | -1.42124 | -0.07822 |
| C | 1.669912 | -2.19626 | -0.66147 |
| H | 1.421545 | -3.10646 | -1.1922  |
| C | 2.980437 | -1.79825 | -0.63681 |
| H | 3.734663 | -2.39329 | -1.13415 |
| C | 3.346529 | -0.57914 | -0.02576 |
| C | 2.332237 | 0.204585 | 0.567343 |
| H | 2.596699 | 1.116267 | 1.086081 |
| C | 1.029475 | -0.21332 | 0.544374 |
| H | 0.291681 | 0.385673 | 1.062581 |
| N | 4.659449 | -0.1627  | -0.00986 |
| C | 4.984406 | 1.219163 | 0.034021 |
| C | 4.318467 | 2.127317 | -0.78489 |
| H | 3.559255 | 1.779783 | -1.47536 |
| C | 4.65241  | 3.470558 | -0.74089 |
| H | 4.126728 | 4.148388 | -1.399   |
| C | 5.648101 | 3.950029 | 0.110901 |
| C | 6.306492 | 3.013845 | 0.920148 |
| H | 7.081842 | 3.342166 | 1.600915 |
| C | 5.993747 | 1.671583 | 0.886077 |
| H | 6.512997 | 0.971598 | 1.52921  |
| C | 6.037403 | 5.426126 | 0.183334 |
| C | 5.213949 | 6.291529 | -0.77426 |
| H | 5.356081 | 6.002393 | -1.81798 |
| H | 5.52558  | 7.333147 | -0.68473 |
| H | 4.145789 | 6.25529  | -0.54867 |
| C | 7.523603 | 5.575214 | -0.18432 |

|   |          |          |          |
|---|----------|----------|----------|
| H | 7.719486 | 5.217316 | -1.19739 |
| H | 8.175708 | 5.026045 | 0.496926 |
| H | 7.816315 | 6.626126 | -0.13932 |
| C | 5.809738 | 5.937438 | 1.616312 |
| H | 6.082215 | 6.992522 | 1.684275 |
| H | 6.411677 | 5.397704 | 2.349296 |
| H | 4.761774 | 5.844064 | 1.909243 |
| C | 5.723377 | -1.10407 | -0.03873 |
| C | 5.69369  | -2.22734 | 0.782754 |
| H | 4.863654 | -2.37976 | 1.462398 |
| C | 6.744347 | -3.12959 | 0.756705 |
| H | 6.699566 | -3.98374 | 1.418081 |
| C | 7.845822 | -2.94684 | -0.07982 |
| C | 7.851837 | -1.80571 | -0.89342 |
| H | 8.68379  | -1.62651 | -1.5629  |
| C | 6.819376 | -0.89195 | -0.87661 |
| H | 6.846905 | -0.0219  | -1.52122 |
| C | 9.019733 | -3.92434 | -0.13136 |
| C | 9.149318 | -4.4811  | -1.55953 |
| H | 9.983844 | -5.18311 | -1.61317 |
| H | 9.336013 | -3.69632 | -2.29443 |
| H | 8.244973 | -5.01409 | -1.86119 |
| C | 8.838116 | -5.10137 | 0.830702 |
| H | 8.772236 | -4.77722 | 1.871729 |
| H | 9.69713  | -5.76973 | 0.756528 |
| H | 7.949825 | -5.6925  | 0.596544 |
| C | 10.31245 | -3.18254 | 0.249077 |
| H | 10.25118 | -2.77126 | 1.258935 |
| H | 10.53473 | -2.36107 | -0.43403 |
| H | 11.16064 | -3.86945 | 0.219404 |

Aminoxyl radical **3**

|   |          |          |          |
|---|----------|----------|----------|
| N | -0.44598 | -0.02338 | -0.1021  |
| C | 0.877387 | -0.49357 | -0.19491 |

|   |          |          |          |
|---|----------|----------|----------|
| C | 1.915497 | 0.124431 | 0.50012  |
| H | 1.709921 | 0.985585 | 1.127647 |
| N | 3.181157 | -0.26706 | 0.437515 |
| C | 3.485779 | -1.31802 | -0.31236 |
| C | 2.523924 | -2.02212 | -1.04577 |
| H | 2.825864 | -2.86652 | -1.64631 |
| C | 1.216961 | -1.59626 | -0.98515 |
| H | 0.448935 | -2.11383 | -1.54738 |
| N | 4.830281 | -1.74332 | -0.36834 |
| O | 5.087834 | -2.75472 | -1.09112 |
| C | 5.964583 | -1.07719 | 0.368097 |
| C | 7.235709 | -1.84842 | 0.026483 |
| H | 7.168442 | -2.8907  | 0.334113 |
| H | 8.072567 | -1.38265 | 0.550395 |
| H | 7.440956 | -1.83167 | -1.04272 |
| C | 5.712945 | -1.15343 | 1.876233 |
| H | 4.834153 | -0.58296 | 2.16463  |
| H | 6.57816  | -0.75173 | 2.408329 |
| H | 5.579289 | -2.19106 | 2.189843 |
| C | 6.10595  | 0.371605 | -0.10591 |
| H | 6.246757 | 0.408085 | -1.18839 |
| H | 6.985149 | 0.820862 | 0.361246 |
| H | 5.234174 | 0.965299 | 0.155576 |
| C | -1.52366 | -0.94311 | -0.0554  |
| C | -1.44306 | -2.09959 | 0.720149 |
| H | -0.54874 | -2.29396 | 1.300666 |
| C | -2.49535 | -2.99601 | 0.753962 |
| H | -2.3906  | -3.88253 | 1.369486 |
| C | -3.67668 | -2.78007 | 0.039759 |
| C | -3.74464 | -1.6157  | -0.72009 |
| H | -4.63132 | -1.3931  | -1.29941 |
| C | -2.68912 | -0.71575 | -0.77798 |
| H | -2.77348 | 0.175002 | -1.38925 |
| C | -4.81797 | -3.79796 | 0.11785  |

|   |          |          |          |
|---|----------|----------|----------|
| C | -6.02055 | -3.38678 | -0.73618 |
| H | -6.44521 | -2.43365 | -0.41312 |
| H | -6.80772 | -4.13913 | -0.65211 |
| H | -5.76149 | -3.30314 | -1.79403 |
| C | -5.28897 | -3.93007 | 1.57526  |
| H | -4.48724 | -4.26739 | 2.234479 |
| H | -6.1041  | -4.65478 | 1.650114 |
| H | -5.65198 | -2.97363 | 1.958117 |
| C | -4.32229 | -5.1649  | -0.38122 |
| H | -3.98256 | -5.10437 | -1.41758 |
| H | -5.1257  | -5.90474 | -0.3323  |
| H | -3.49134 | -5.54156 | 0.217709 |
| C | -0.70547 | 1.371428 | -0.0808  |
| C | -1.63983 | 1.906762 | 0.804948 |
| H | -2.16878 | 1.248767 | 1.484343 |
| C | -1.89421 | 3.265614 | 0.817732 |
| H | -2.62821 | 3.640877 | 1.522129 |
| C | -1.22586 | 4.153314 | -0.02985 |
| C | -0.29149 | 3.603034 | -0.90241 |
| H | 0.254732 | 4.237142 | -1.5886  |
| C | -0.03916 | 2.238089 | -0.93867 |
| H | 0.685543 | 1.843759 | -1.64157 |
| C | -1.53475 | 5.651864 | 0.030554 |
| C | -0.70569 | 6.455539 | -0.97515 |
| H | -0.95744 | 7.515442 | -0.89786 |
| H | -0.90154 | 6.148488 | -2.00497 |
| H | 0.36659  | 6.361178 | -0.78967 |
| C | -3.02191 | 5.88296  | -0.28287 |
| H | -3.67331 | 5.374329 | 0.429923 |
| H | -3.27372 | 5.51726  | -1.28087 |
| H | -3.26009 | 6.949269 | -0.24434 |
| C | -1.22423 | 6.183197 | 1.439329 |
| H | -1.81952 | 5.682648 | 2.20496  |
| H | -1.44002 | 7.253177 | 1.50115  |

|   |          |         |          |
|---|----------|---------|----------|
| H | -0.17134 | 6.03663 | 1.690327 |
|---|----------|---------|----------|

Aminoxyl radical **4**

|   |          |          |          |
|---|----------|----------|----------|
| O | -8.26572 | -1.90411 | -0.07448 |
| N | -5.75794 | 0.512717 | 0.045343 |
| N | -7.74355 | -0.74892 | -0.02153 |
| N | 2.091198 | -0.00419 | -0.00213 |
| C | -6.33378 | -0.68043 | -0.0174  |
| C | -2.12378 | -0.40042 | -0.01806 |
| C | -4.4316  | 0.571305 | 0.047209 |
| H | -4.00744 | 1.56815  | 0.125457 |
| C | -3.59358 | -0.53895 | -0.01929 |
| C | 2.689747 | 1.281616 | -0.01489 |
| C | 4.584102 | -3.44581 | -0.00815 |
| C | 2.919825 | -1.15568 | -0.00469 |
| C | -1.31388 | -1.29578 | 0.6826   |
| H | -1.77061 | -2.09013 | 1.263192 |
| C | -8.6554  | 0.451417 | 0.033142 |
| C | 2.647534 | -2.23501 | -0.83668 |
| H | 1.788978 | -2.19706 | -1.49698 |
| C | 0.688567 | -0.13637 | -0.00888 |
| C | 0.062724 | -1.16689 | 0.696218 |
| H | 0.663779 | -1.86451 | 1.266297 |
| C | 3.461869 | -3.35964 | -0.8272  |
| H | 3.207367 | -4.17476 | -1.49222 |
| C | -4.22765 | -1.78439 | -0.08067 |
| H | -3.63472 | -2.68953 | -0.1528  |
| C | -5.60126 | -1.87117 | -0.0783  |
| H | -6.1223  | -2.81463 | -0.13297 |
| C | -1.49051 | 0.629145 | -0.71573 |
| H | -2.08301 | 1.323052 | -1.30196 |
| C | 3.773963 | 1.555561 | -0.83962 |
| H | 4.160298 | 0.778305 | -1.48849 |
| C | 3.89772  | 3.842222 | -0.02788 |



|   |          |          |          |
|---|----------|----------|----------|
| C | 4.367848 | 2.810785 | -0.83546 |
| H | 5.210786 | 2.97417  | -1.49437 |
| C | -0.11338 | 0.758868 | -0.71962 |
| H | 0.350765 | 1.555404 | -1.28797 |
| C | 2.213202 | 2.300795 | 0.809377 |
| H | 1.373981 | 2.106985 | 1.467125 |
| C | 4.848765 | -2.34726 | 0.814034 |
| H | 5.707144 | -2.36294 | 1.47643  |
| C | 5.508658 | -4.66617 | 0.020517 |
| C | 2.802796 | 3.55116  | 0.790528 |
| H | 2.400958 | 4.315088 | 1.446878 |
| C | 4.03629  | -1.22859 | 0.827317 |
| H | 4.266017 | -0.39832 | 1.484814 |
| C | -8.41077 | 1.339058 | -1.18977 |
| H | -8.54517 | 0.767842 | -2.11091 |
| H | -7.41082 | 1.764236 | -1.18244 |
| H | -9.13568 | 2.156039 | -1.19392 |
| C | -10.0879 | -0.07216 | 0.001005 |
| H | -10.7672 | 0.781487 | 0.039404 |
| H | -10.2977 | -0.72258 | 0.848648 |
| H | -10.2895 | -0.63706 | -0.90781 |
| C | -8.42161 | 1.214863 | 1.339215 |
| H | -7.421   | 1.636304 | 1.382896 |
| H | -8.56549 | 0.556449 | 2.198641 |
| H | -9.14566 | 2.028987 | 1.416438 |
| C | 4.522072 | 5.240265 | -0.00573 |
| C | 5.055716 | -5.7597  | -0.95093 |
| H | 4.057257 | -6.13217 | -0.71119 |
| H | 5.741282 | -6.60819 | -0.89763 |
| H | 5.049409 | -5.41045 | -1.98588 |
| C | 6.933425 | -4.24064 | -0.36971 |
| H | 6.953616 | -3.81418 | -1.37512 |
| H | 7.607783 | -5.10105 | -0.35455 |
| H | 7.338096 | -3.49312 | 0.314767 |

|   |          |          |          |
|---|----------|----------|----------|
| C | 5.527315 | -5.26274 | 1.437222 |
| H | 5.887212 | -4.5459  | 2.177291 |
| H | 6.184525 | -6.13556 | 1.476715 |
| H | 4.527486 | -5.57957 | 1.742301 |
| C | 5.705109 | 5.362114 | -0.9702  |
| H | 6.510685 | 4.668452 | -0.7192  |
| H | 6.118145 | 6.372025 | -0.92242 |
| H | 5.409103 | 5.179778 | -2.00571 |
| C | 5.026474 | 5.555165 | 1.411932 |
| H | 4.220036 | 5.531694 | 2.146929 |
| H | 5.474979 | 6.551646 | 1.446369 |
| H | 5.783348 | 4.833739 | 1.727856 |
| C | 3.465707 | 6.280913 | -0.41126 |
| H | 3.089172 | 6.085469 | -1.41783 |
| H | 3.894798 | 7.286433 | -0.40088 |
| H | 2.611032 | 6.280738 | 0.267432 |

Copies of the  $^1\text{H}$  and  $^{13}\text{C}$  NMR and HRMS spectra

Compound 5

$^1\text{H}$  NMR (600 MHz,  $\text{CDCl}_3$ )

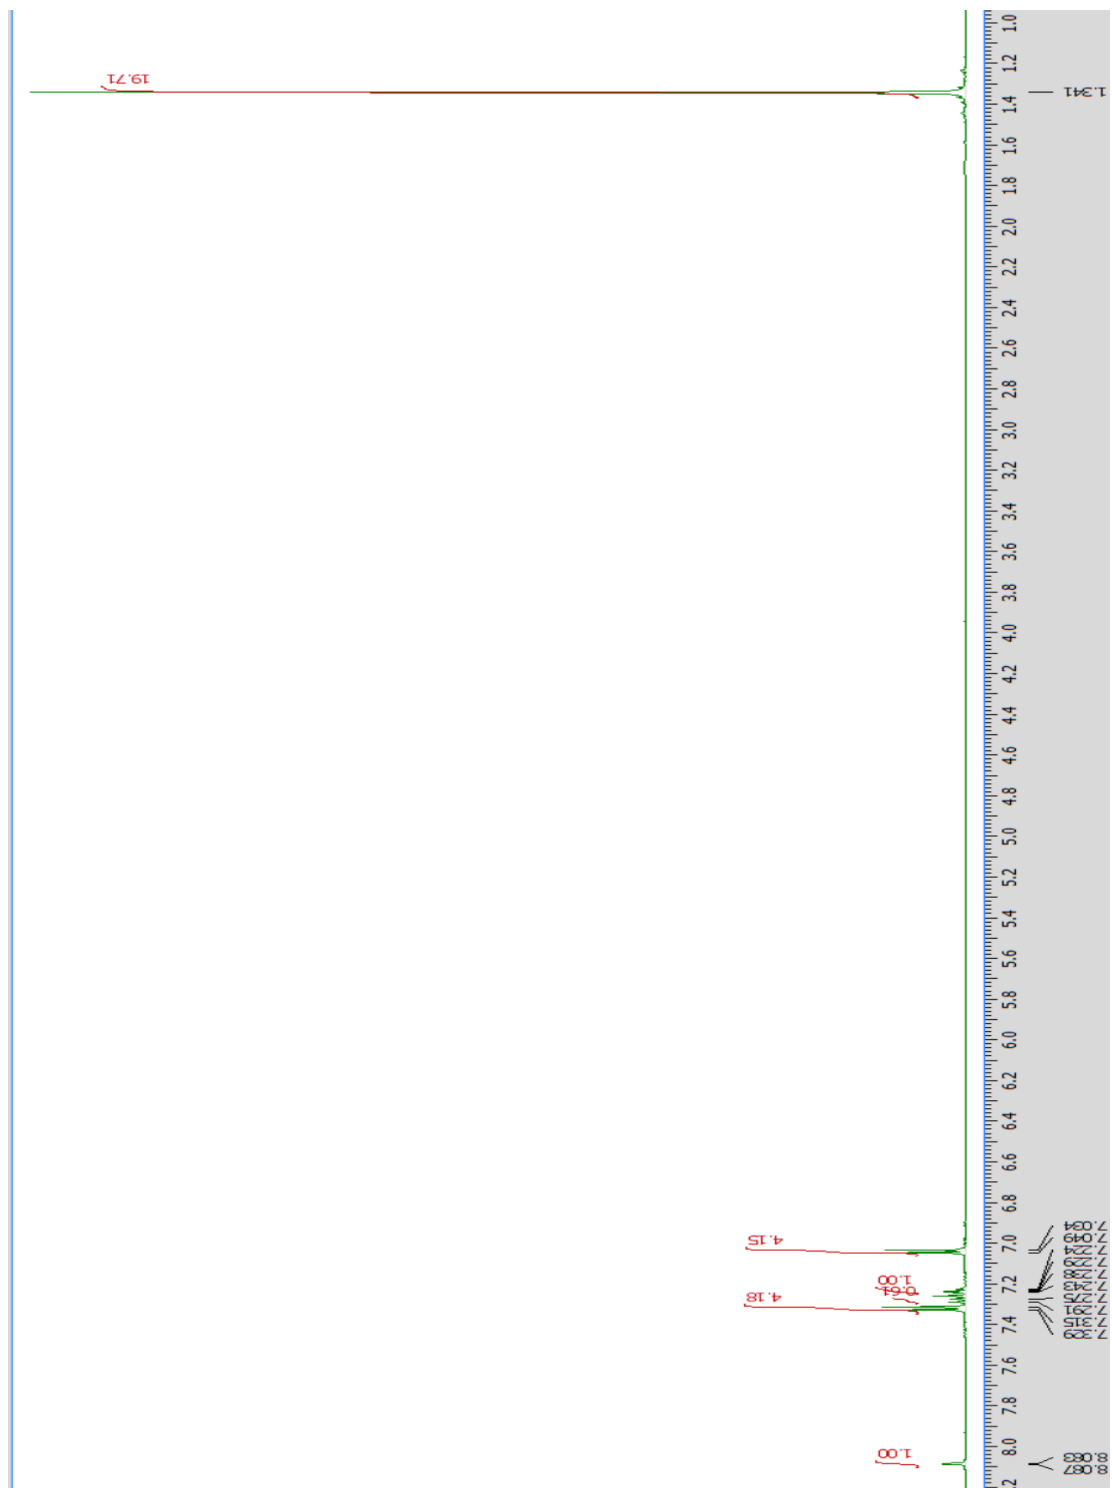

$^{13}\text{C}$  NMR (150 MHz,  $\text{CDCl}_3$ )

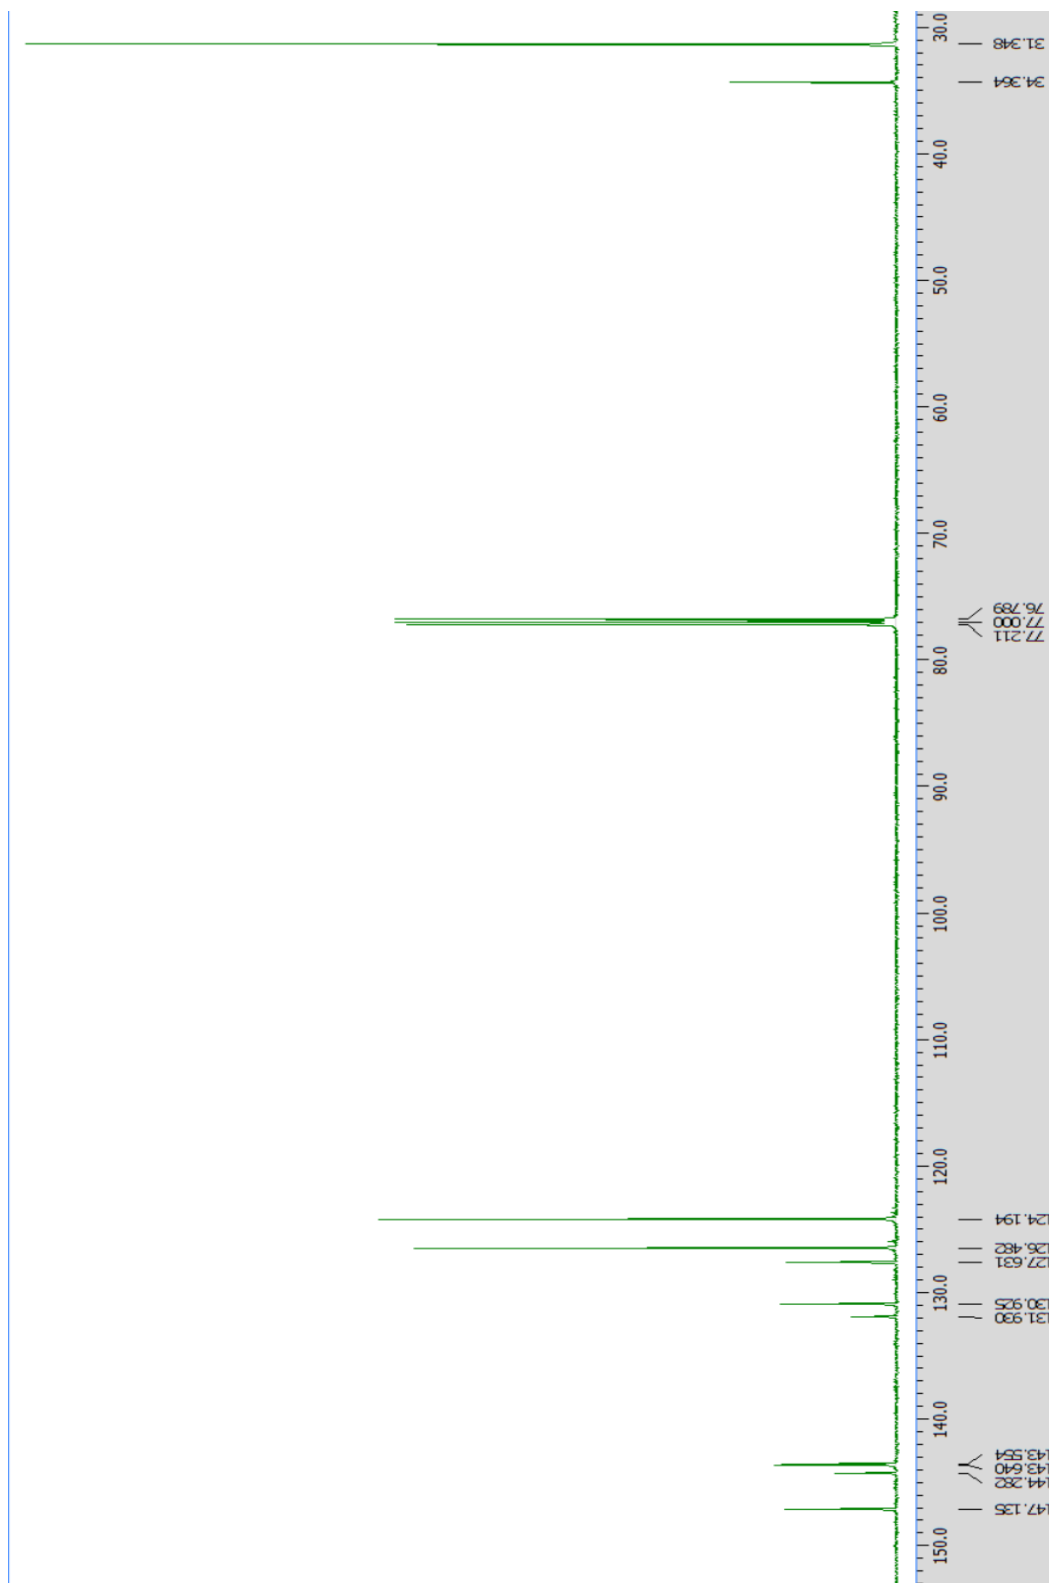

# HRMS (APCI<sup>+</sup>)

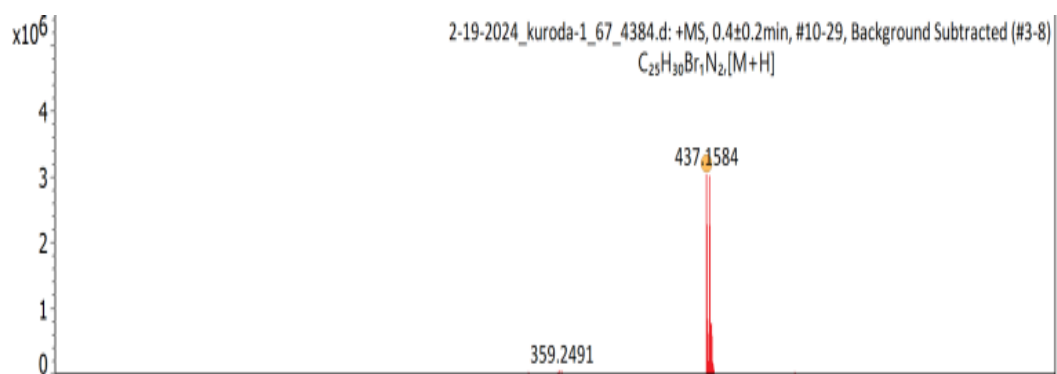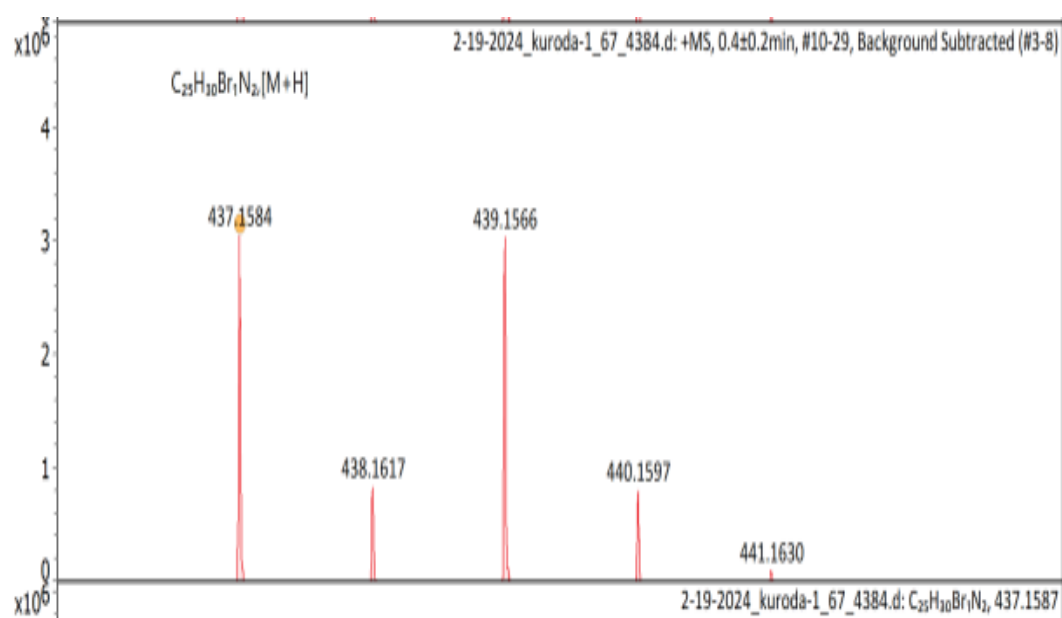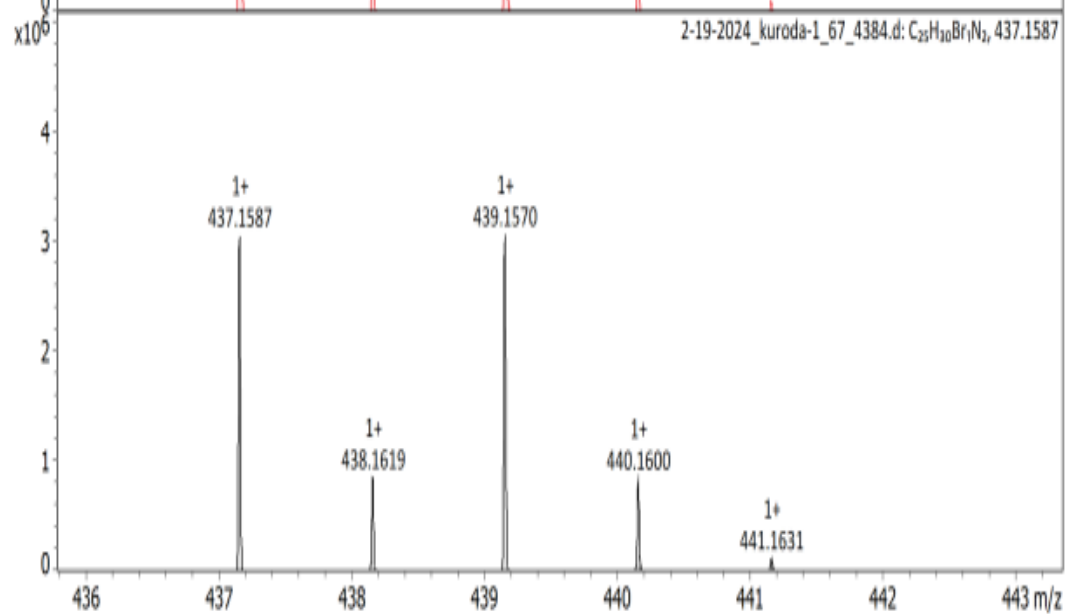

Compound **6**

$^1\text{H}$  NMR (600 MHz,  $\text{CDCl}_3$ )

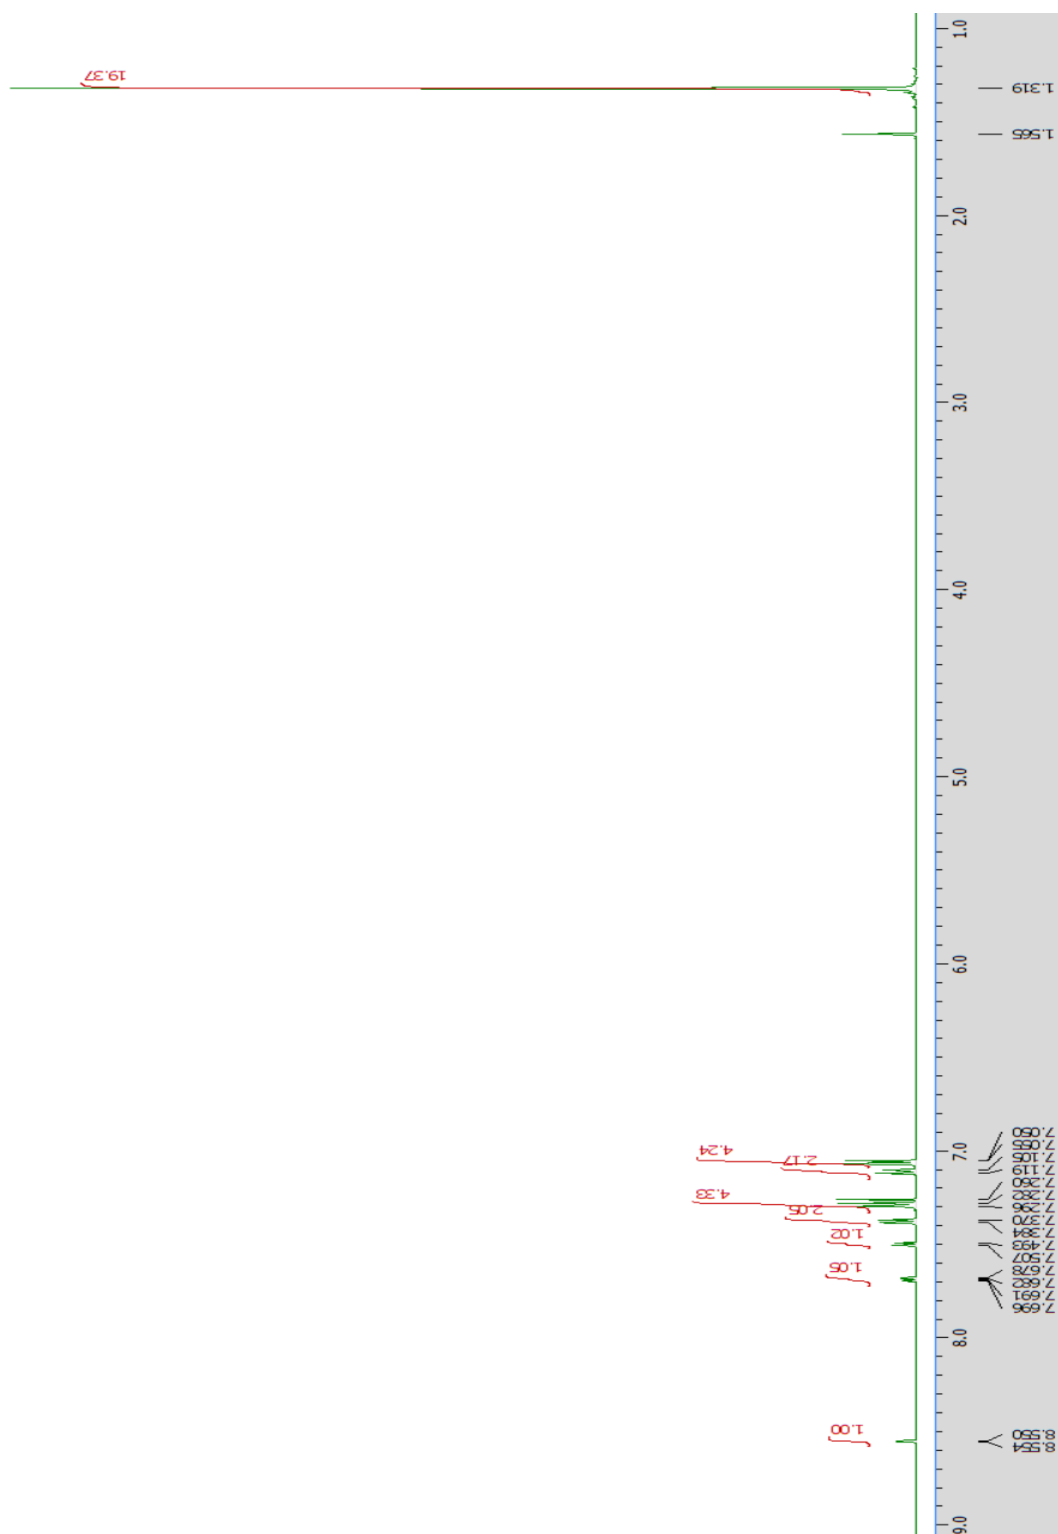

$^{13}\text{C}$  NMR (151 MHz,  $\text{CDCl}_3$ )

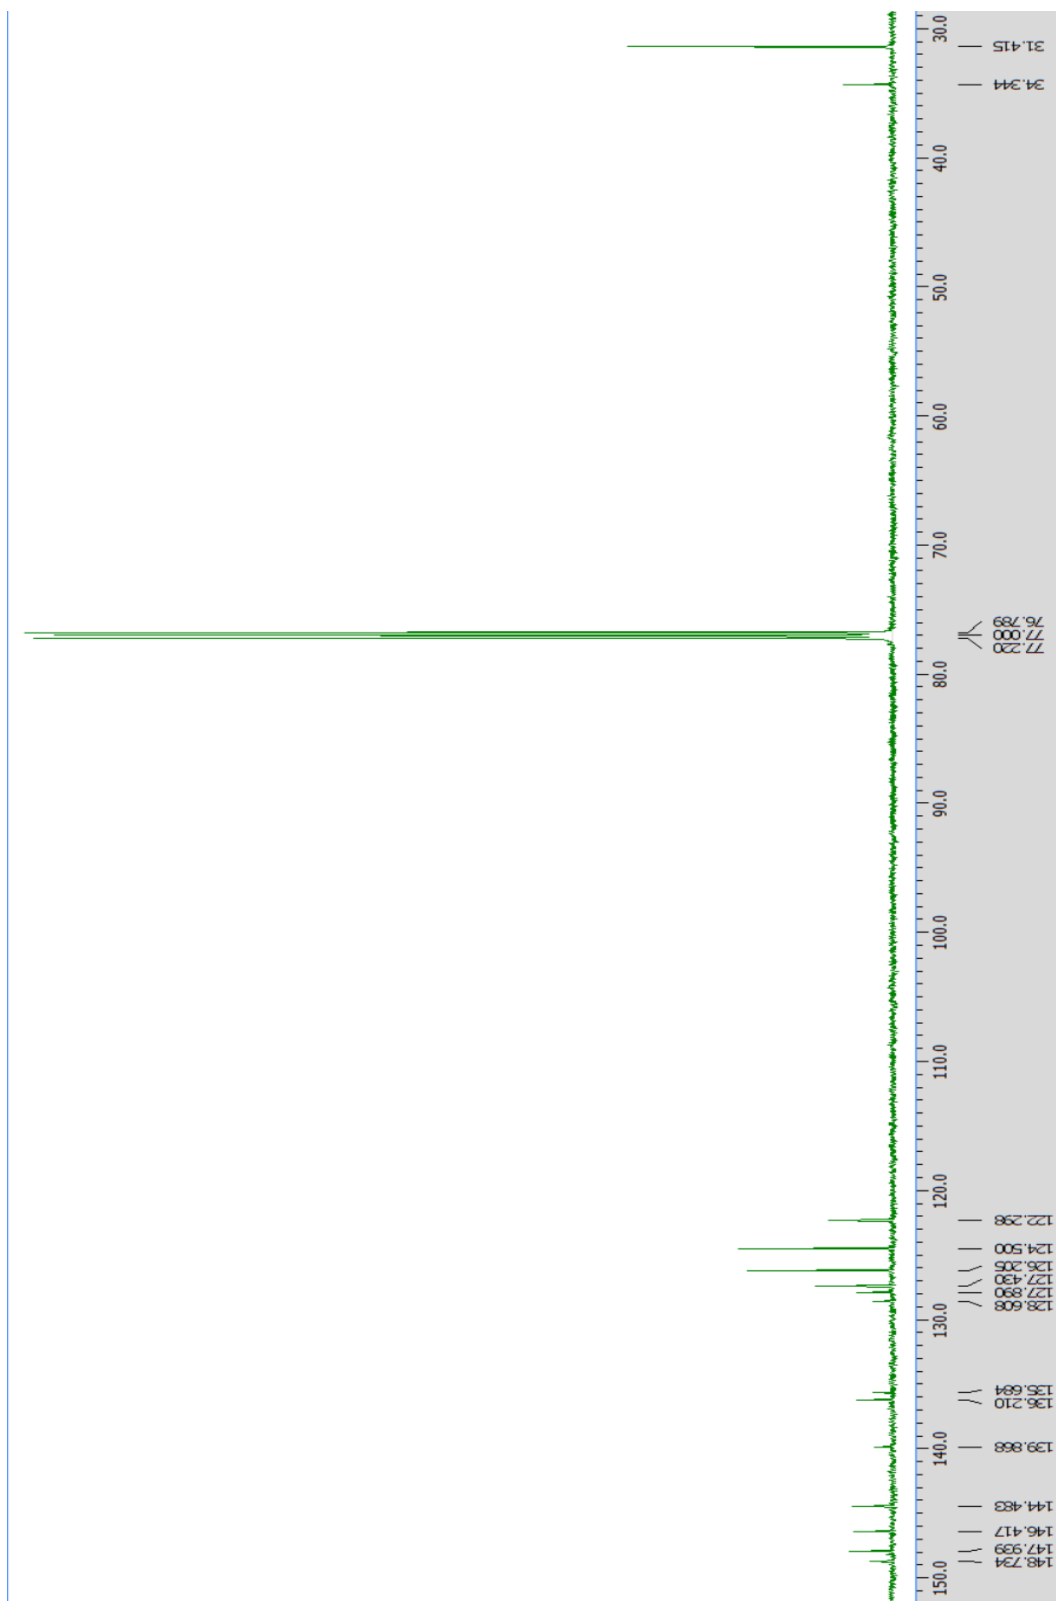

# HRMS (APCI<sup>+</sup>)

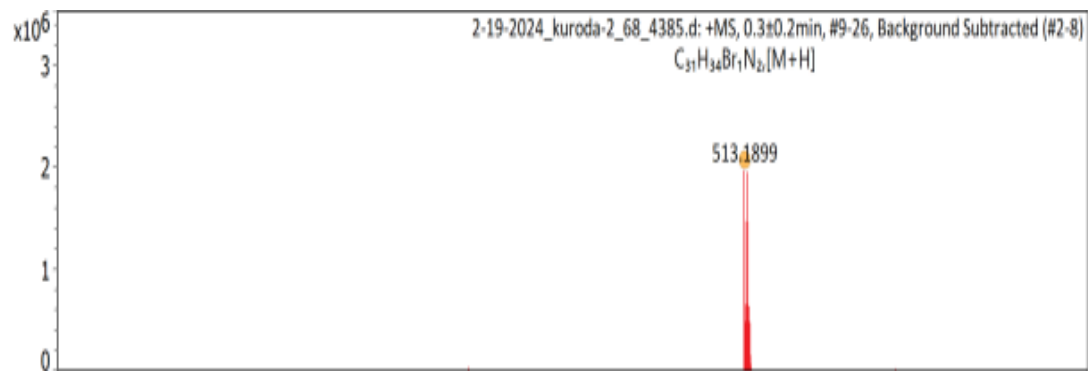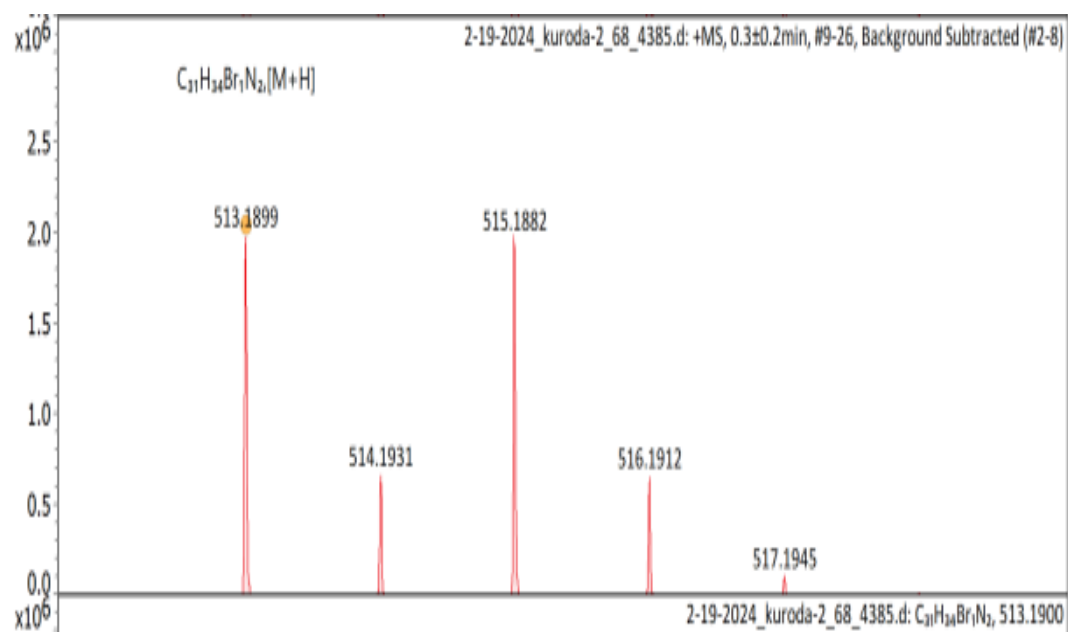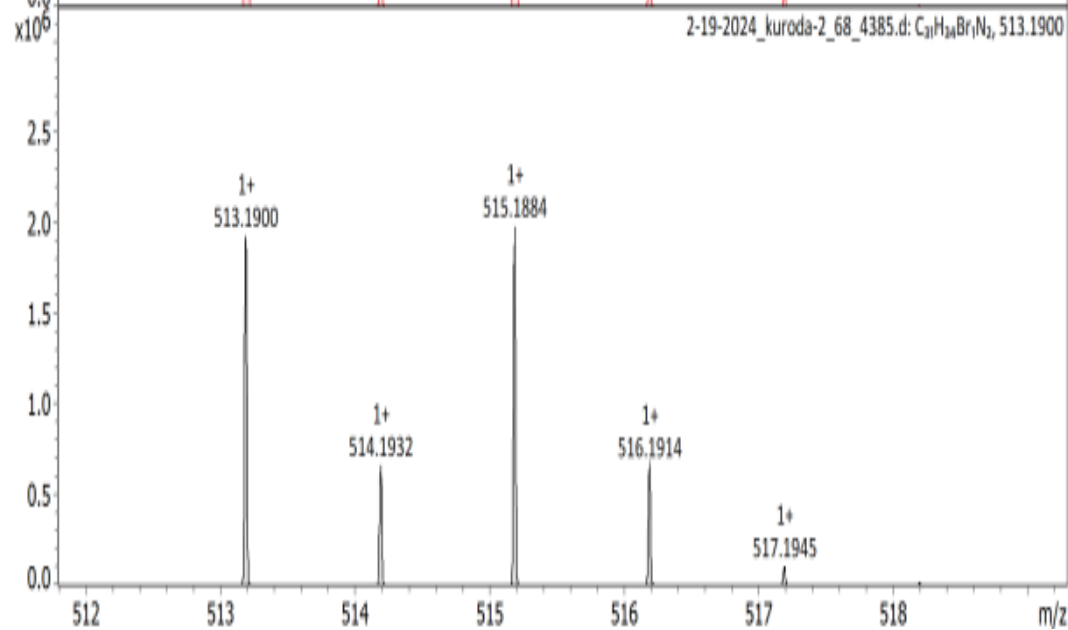



Aminoxide complex **2**

$^1\text{H}$  NMR (600 MHz,  $\text{CDCl}_3$ )

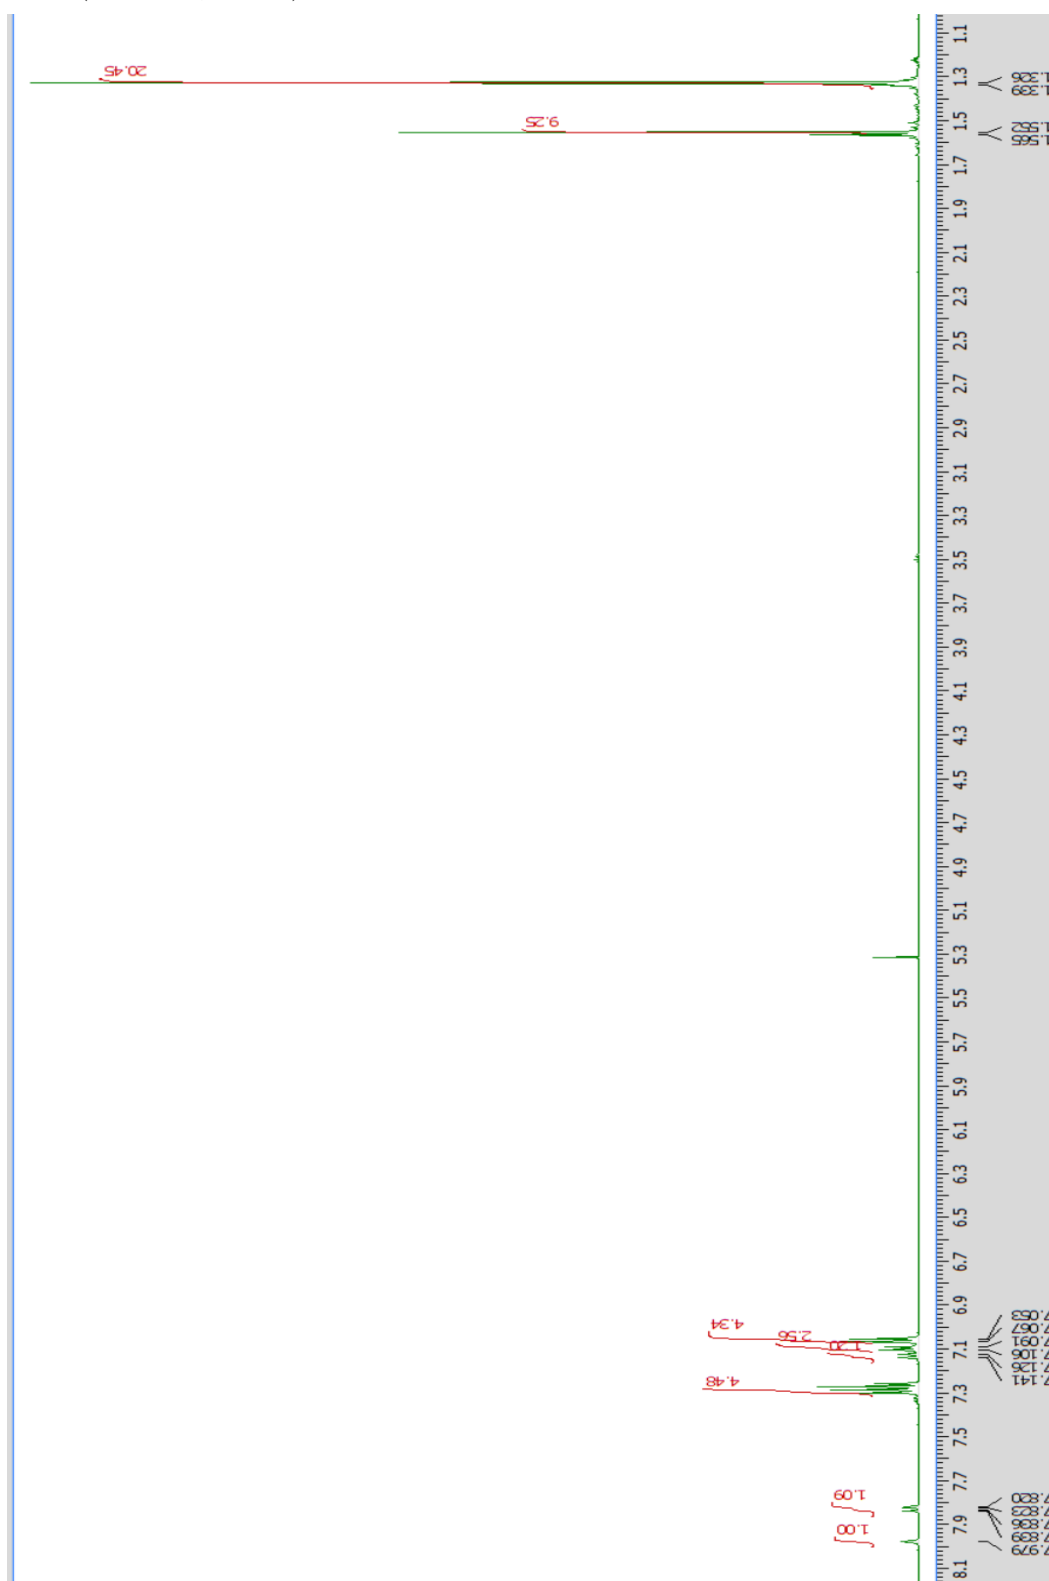

$^{13}\text{C}$  NMR (151 MHz,  $\text{CDCl}_3$ )

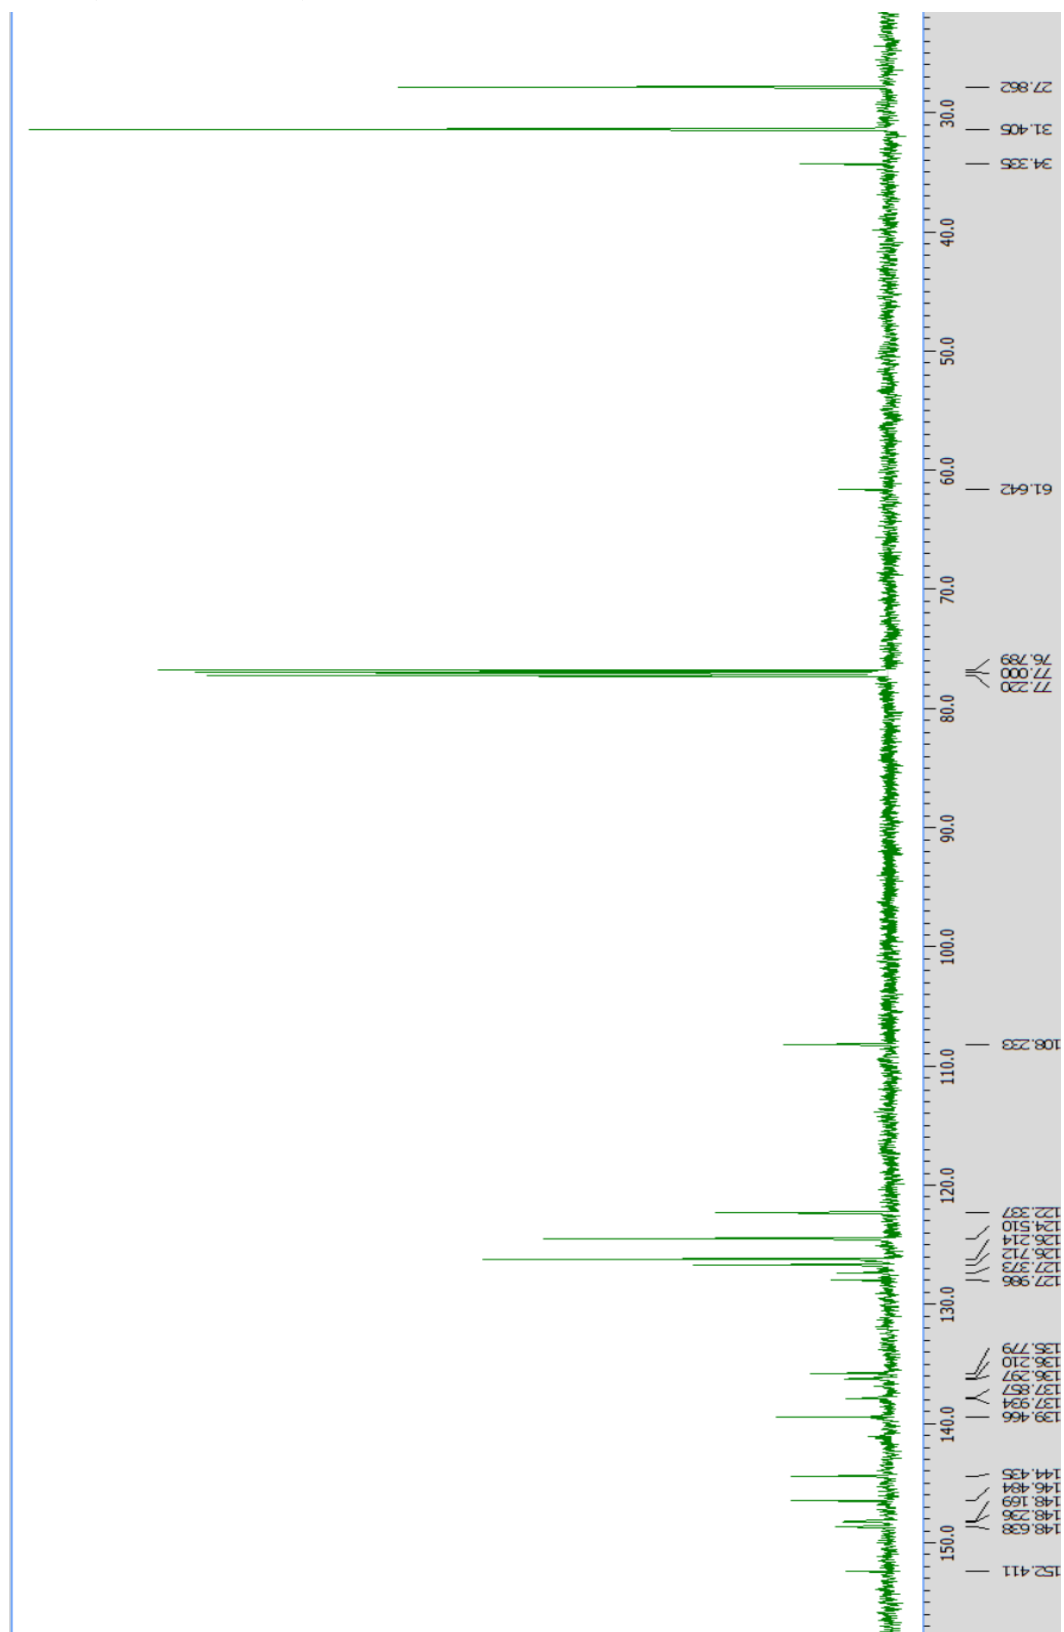

$^{19}\text{F}$  NMR (575 MHz,  $\text{CDCl}_3$ )

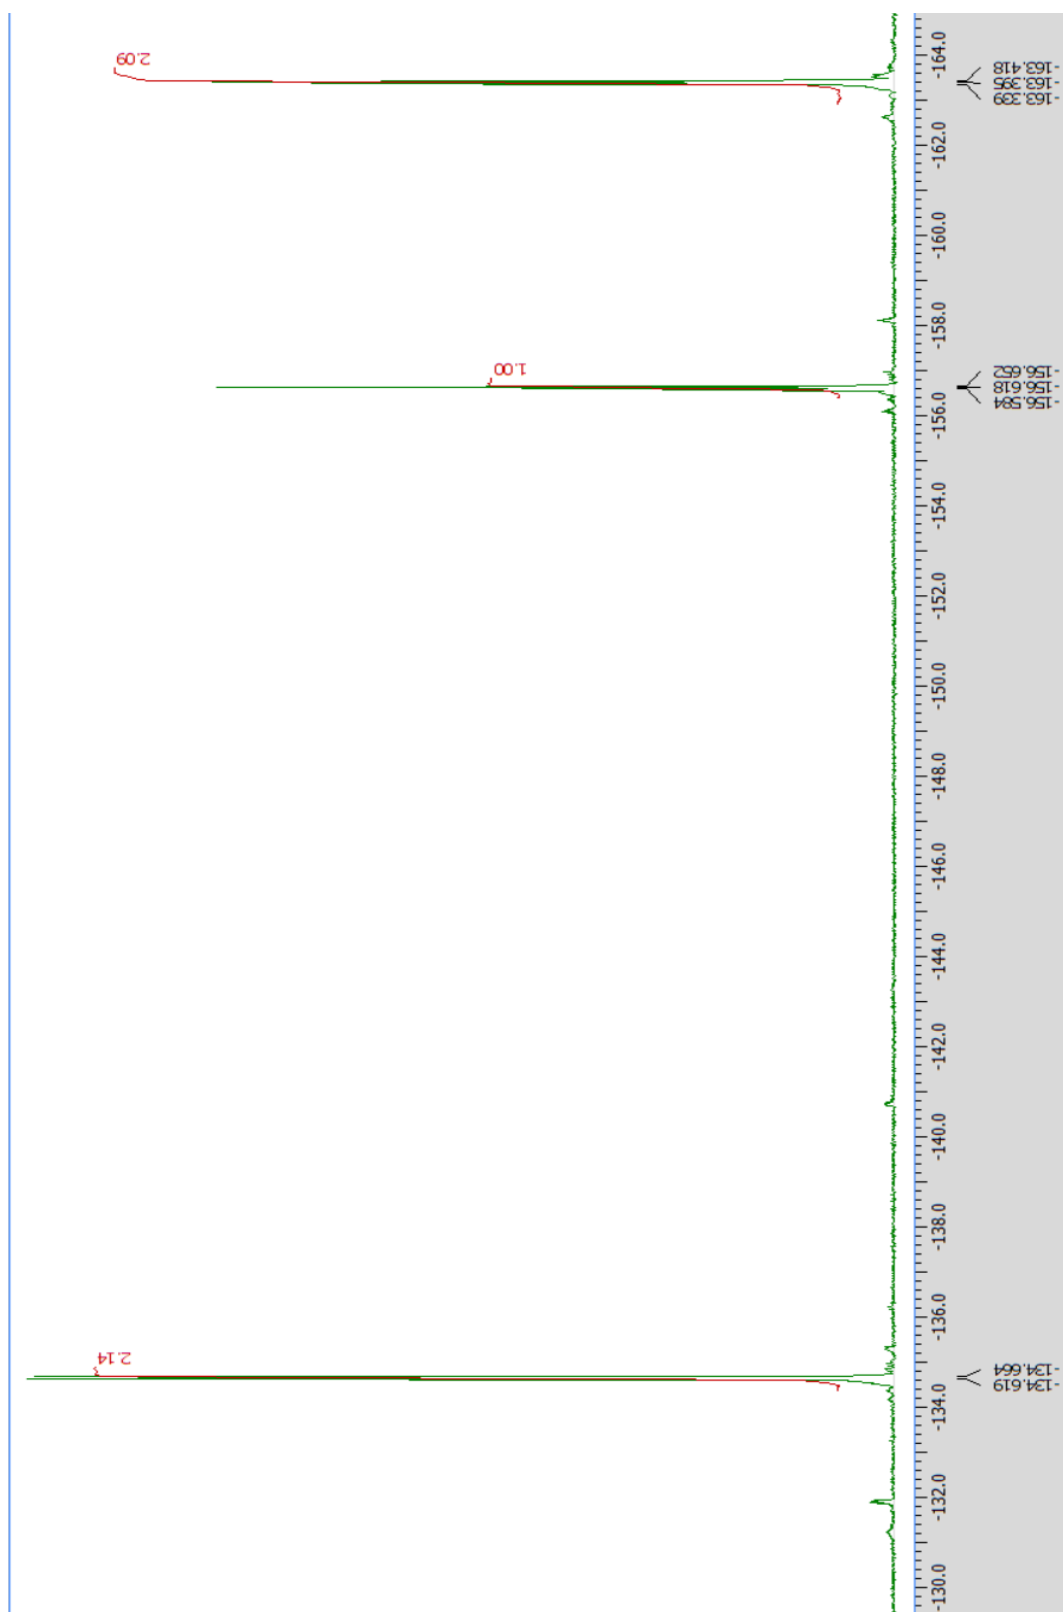

# HRMS (APCI<sup>+</sup>)

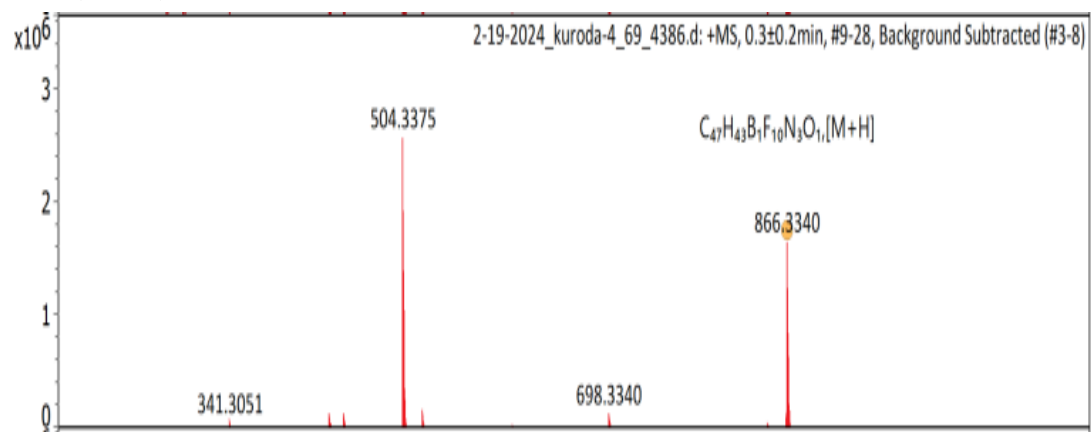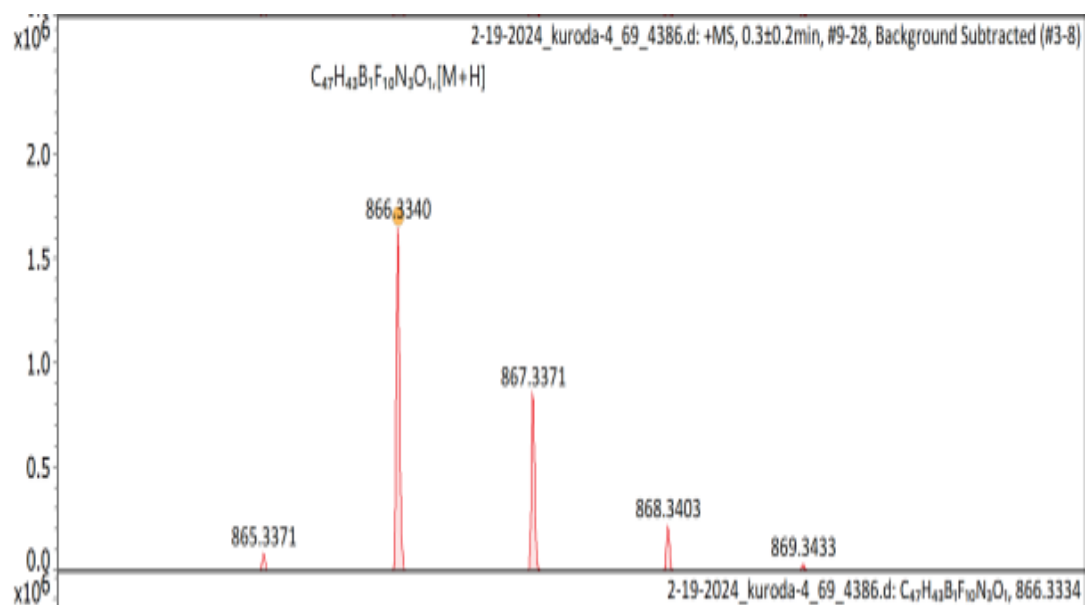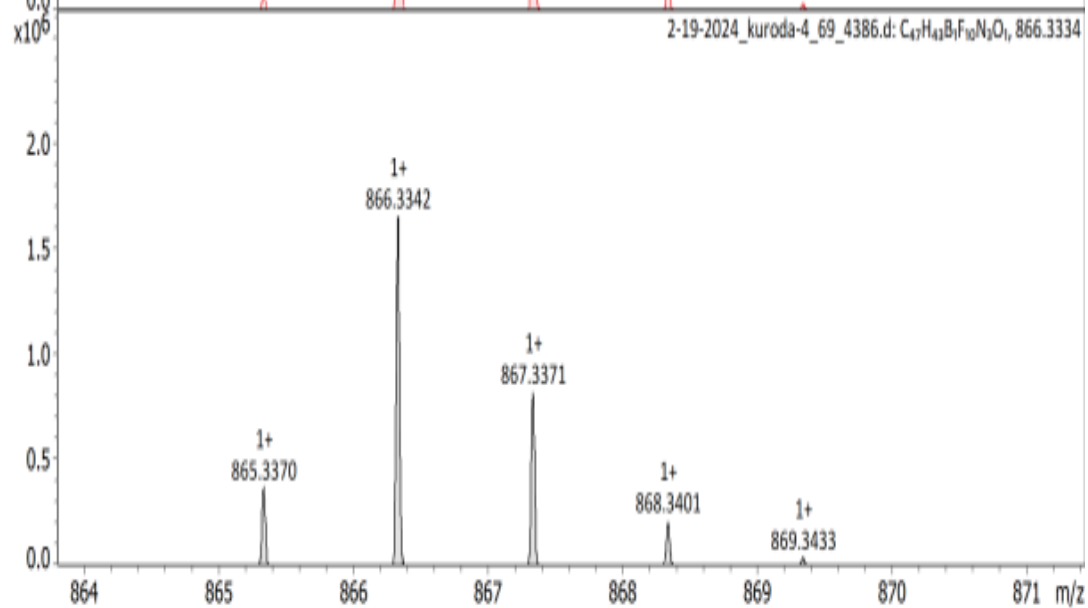

Aminoxy complex [2]SbCl<sub>6</sub>

HRMS (APCI<sup>+</sup>)

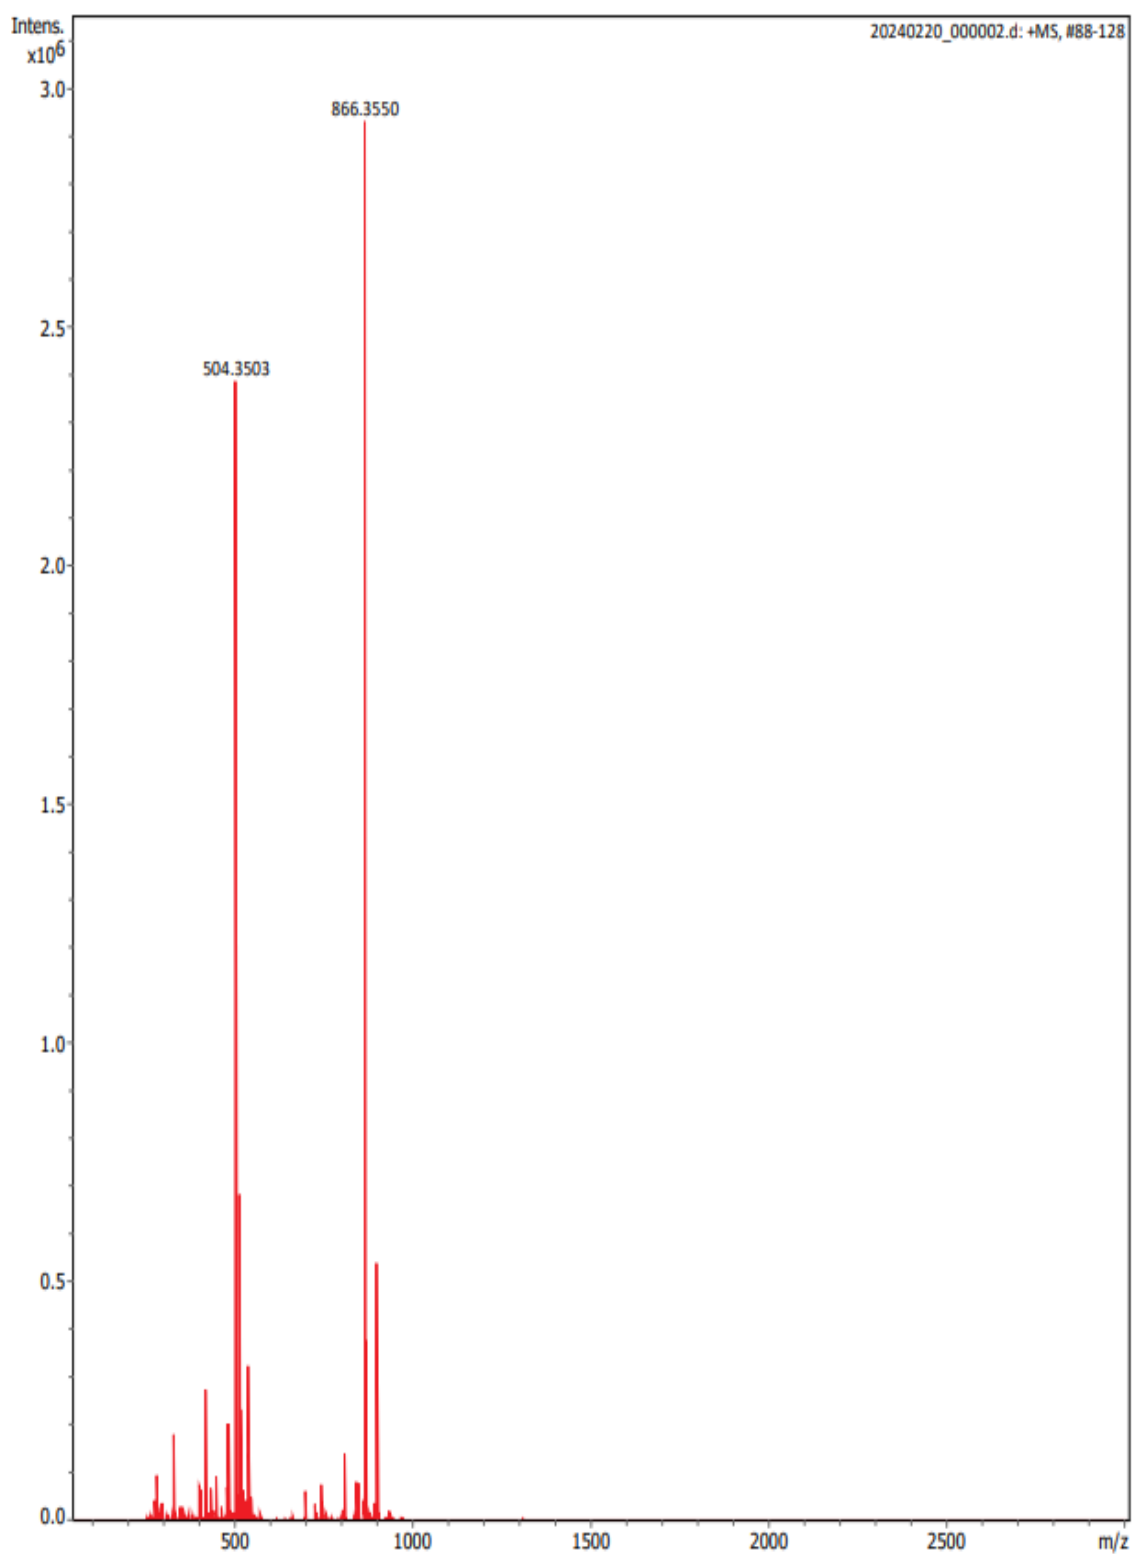

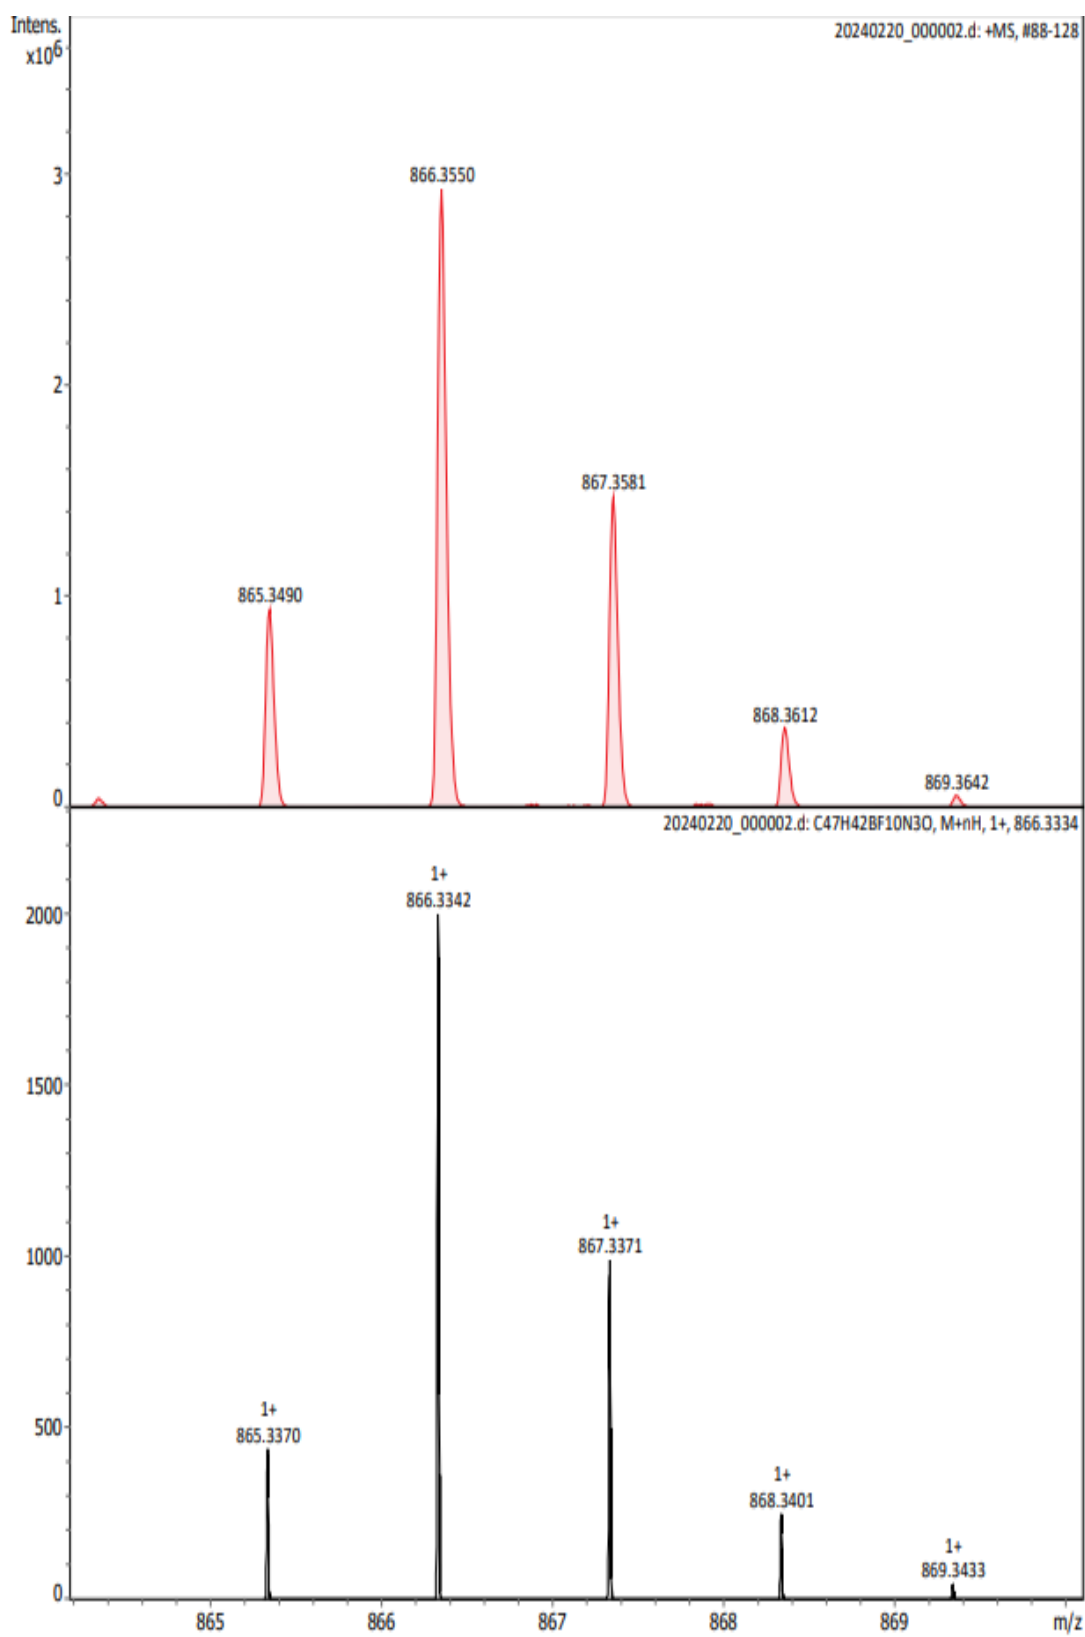

Aminoxyl radical **3**

HRMS (APCI<sup>+</sup>)

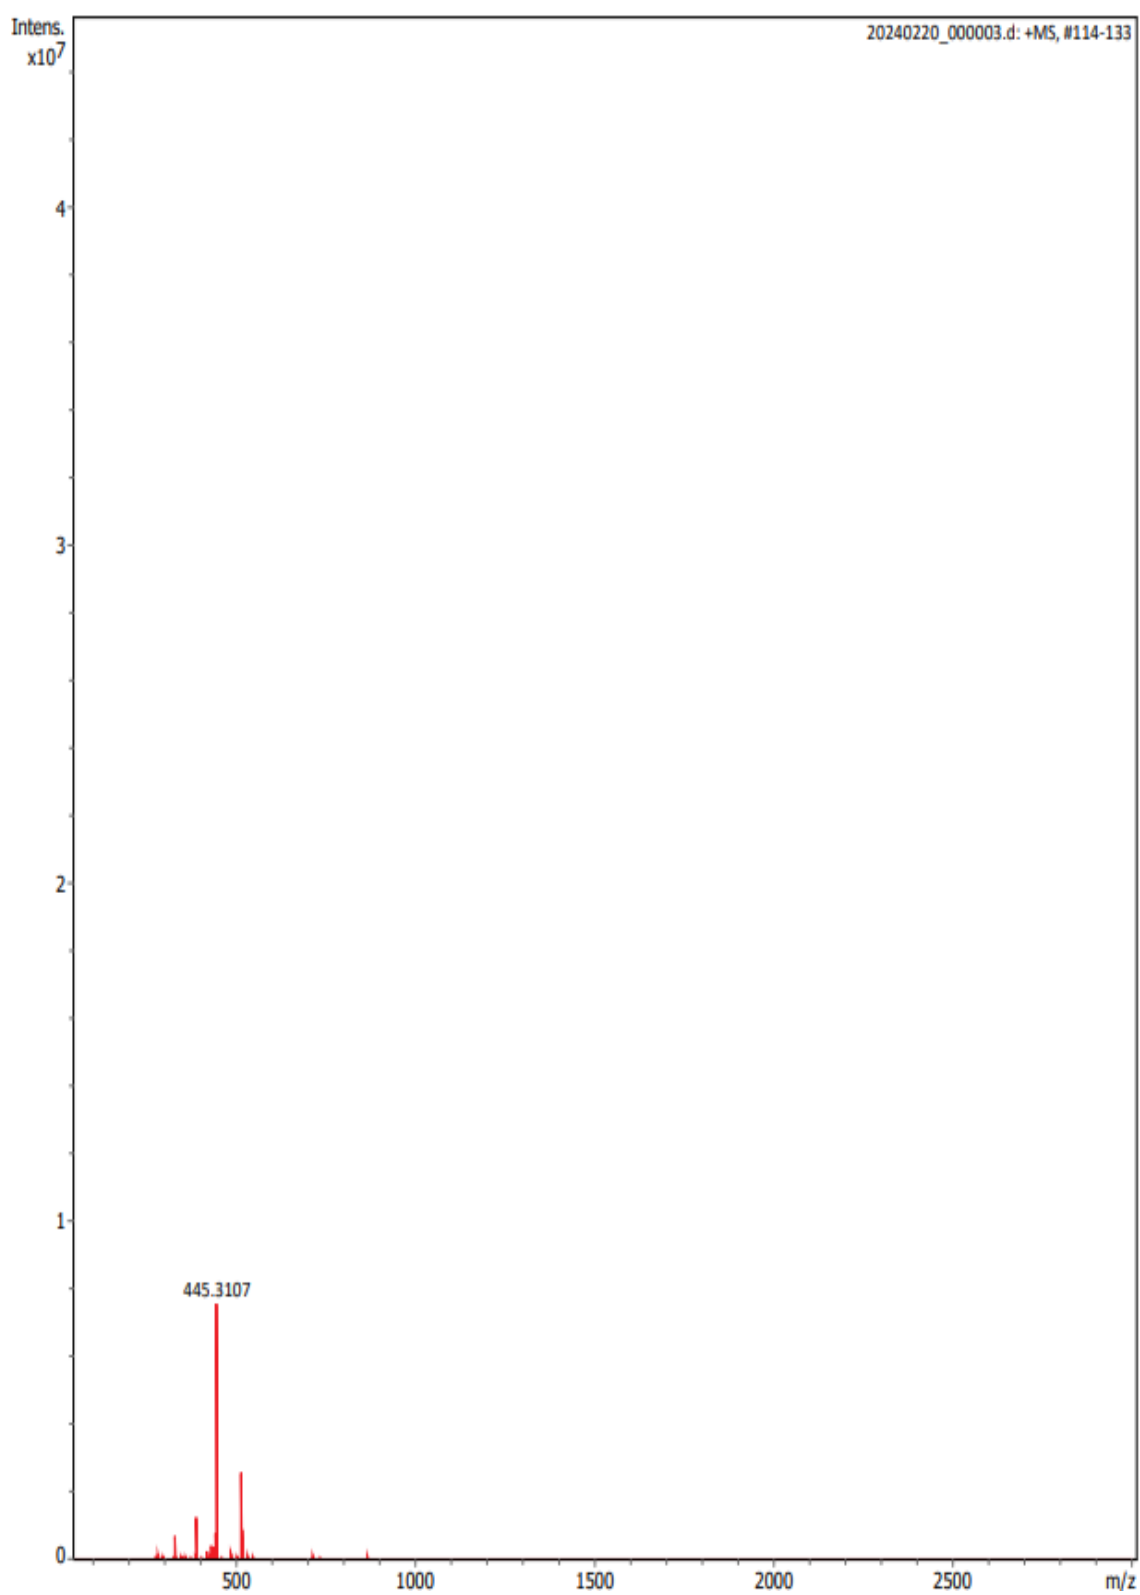

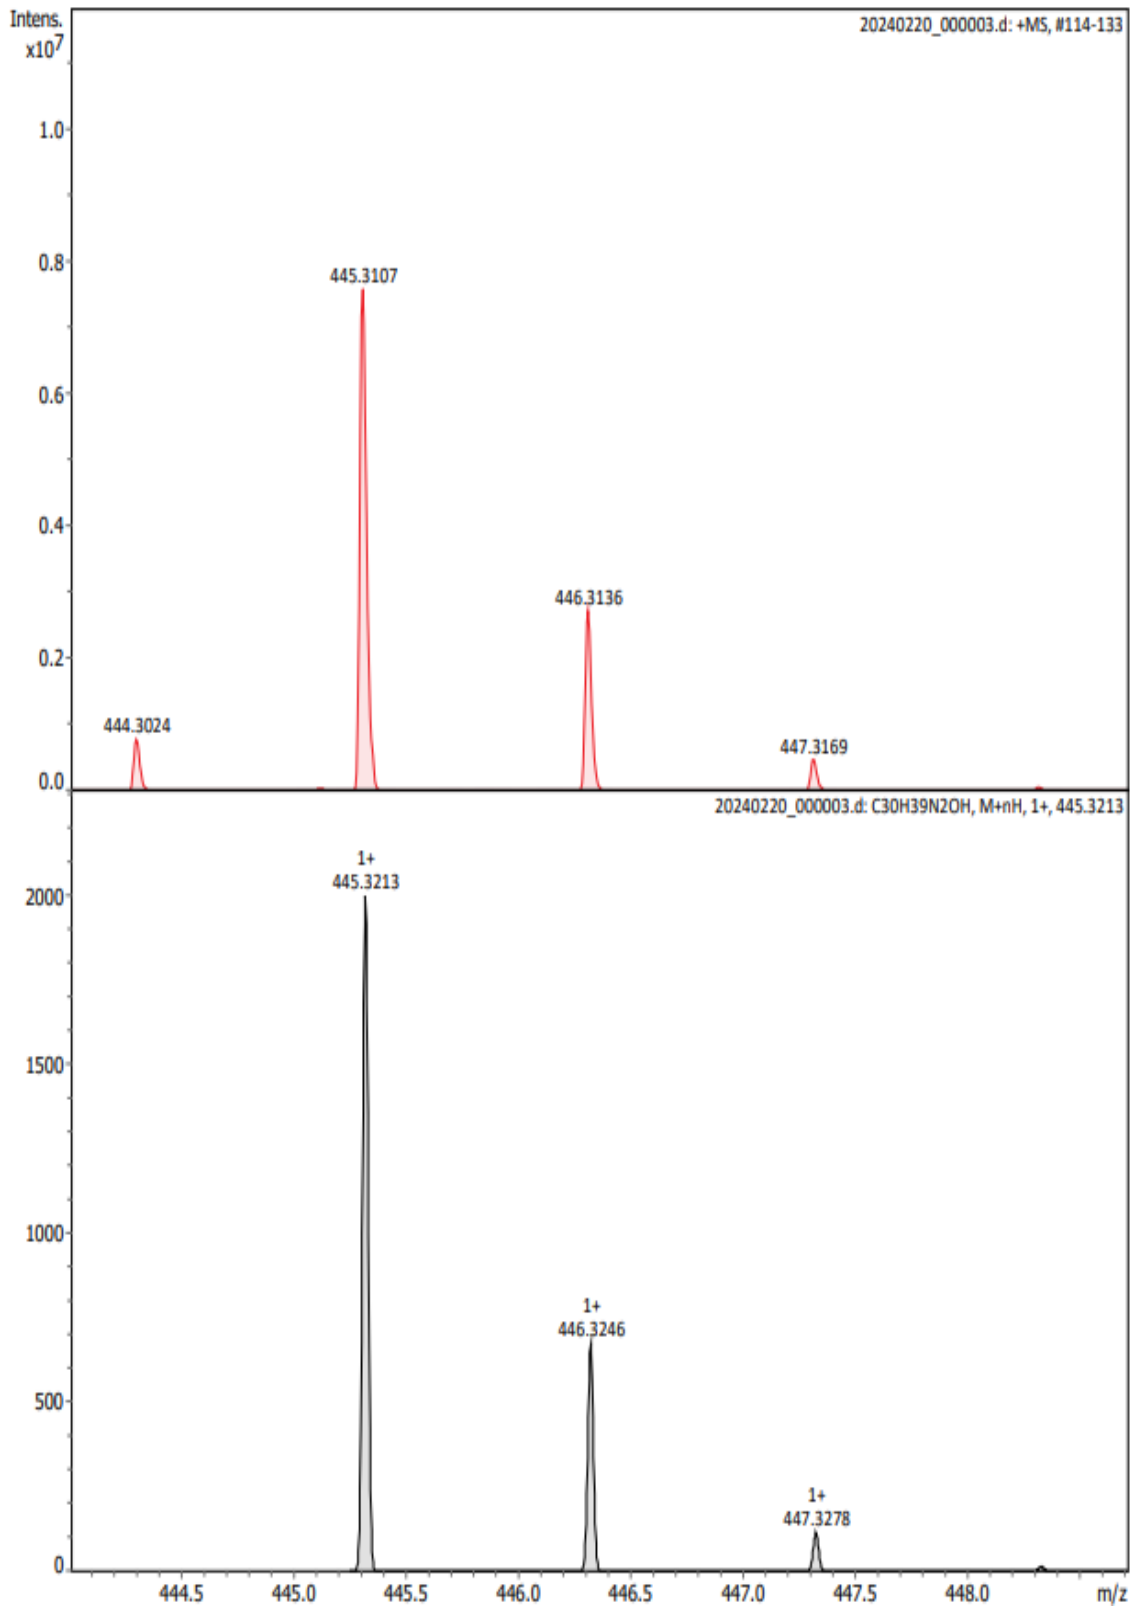



Aminoxyl radical **4**

HRMS (APCI<sup>+</sup>)

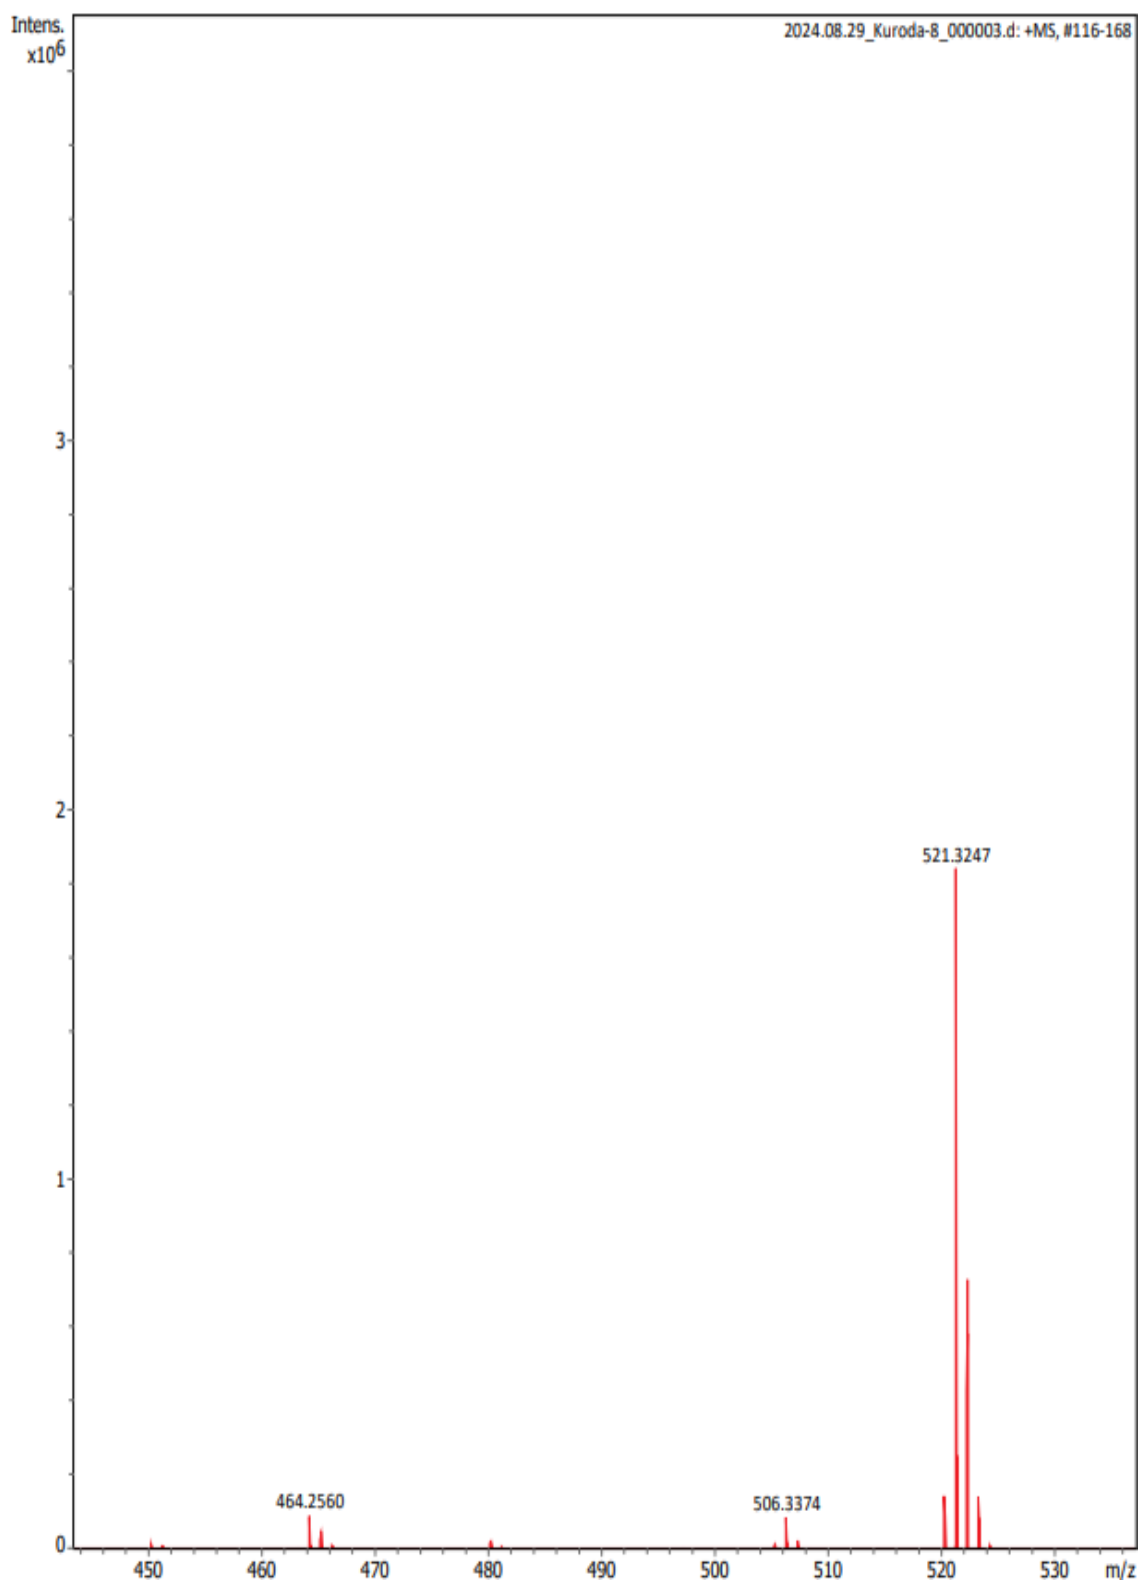

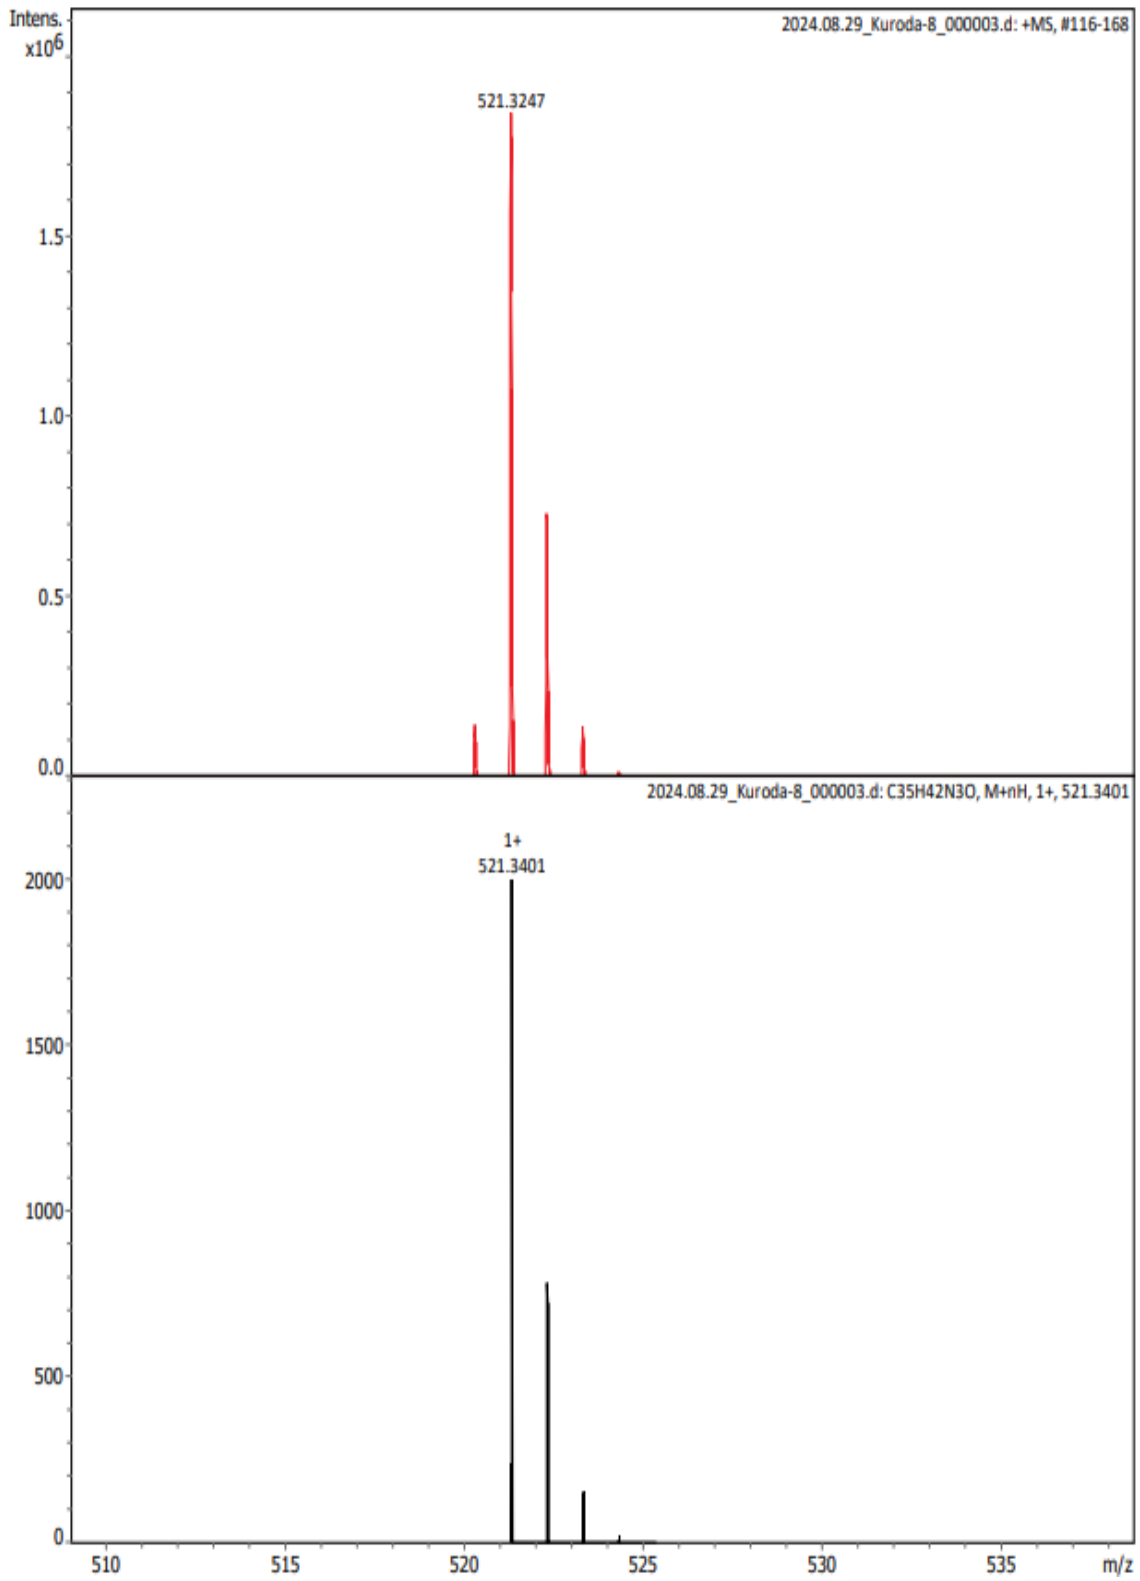

## References

- 1 C. P. Rosenau, B. J. Jelier, A. D. Gosserez and A. Togni, *Angew. Chem. Int. Ed.*, 2018, **57**, 9528-9533.
- 2 R. Duchateau, S. J. Lancaster, M. Thornton-Pett and M. Bochmann, *Organometallics*, 1997, **16**, 4995-5005.
- 3 Q. Wang, J. U. Wallace, T. Y.-H. Lee, J. J. Ou, Y.-T. Tsai, Y.-H. Huang, C.-C. Wu, L. J. Rothberg and S. H. Chen, *J. Mater. Chem. C*, 2013, **1**, 2224-2232.
- 4 O. V. Dolomanov, L. J. Bourhis, R. J. Gildea, J. A. K. Howard and H. Puschmann, *J. Appl. Cryst.*, 2009, **42**, 339-341.
- 5 a) G. M. Sheldrick, *Acta Cryst.*, 2008, **A64**, 112-122; G. M. Sheldrick, *Acta Cryst.*, 2015, **C71**, 3-8.
